# Supplementary material for: Tailoring strained oxanorbornane headgroups to dimensionally controlled nanostructures through hydrogen bonding
Source: Royal Society of Chemistry journal article supplement (doi:10.1039/c3ra45708g), 2013-12-03
Supplement: c3ra45708g.pdf [file c3ra45708g.pdf]

## Synthesis of Oxanorbornane based Amphiphilic Systems

(Ref. RSC Advances, 2012, 2, 4048-4051)

Synthesis of the target molecules started with cycloaddition of *O*-benzyl protected furfuryl alcohol with maleic anhydride. By this method, we were able to prepare a compound with one head group and two lipophilic chains as shown in Scheme 1. Towards this, the anhydride ( $\pm$ )-**3** was first reduced using lithium aluminium hydride to get the diol ( $\pm$ )-**4** and then acylated with palmitoyl chloride. Treatment of resulting diesters ( $\pm$ )-**5** with OsO<sub>4</sub> led to the formation of *cis*-dihydroxylated product ( $\pm$ )-**6** which on hydrogenolysis in presence of H<sub>2</sub>-Pd/C afforded the amphiphile ( $\pm$ )-**7** in 71% yield.

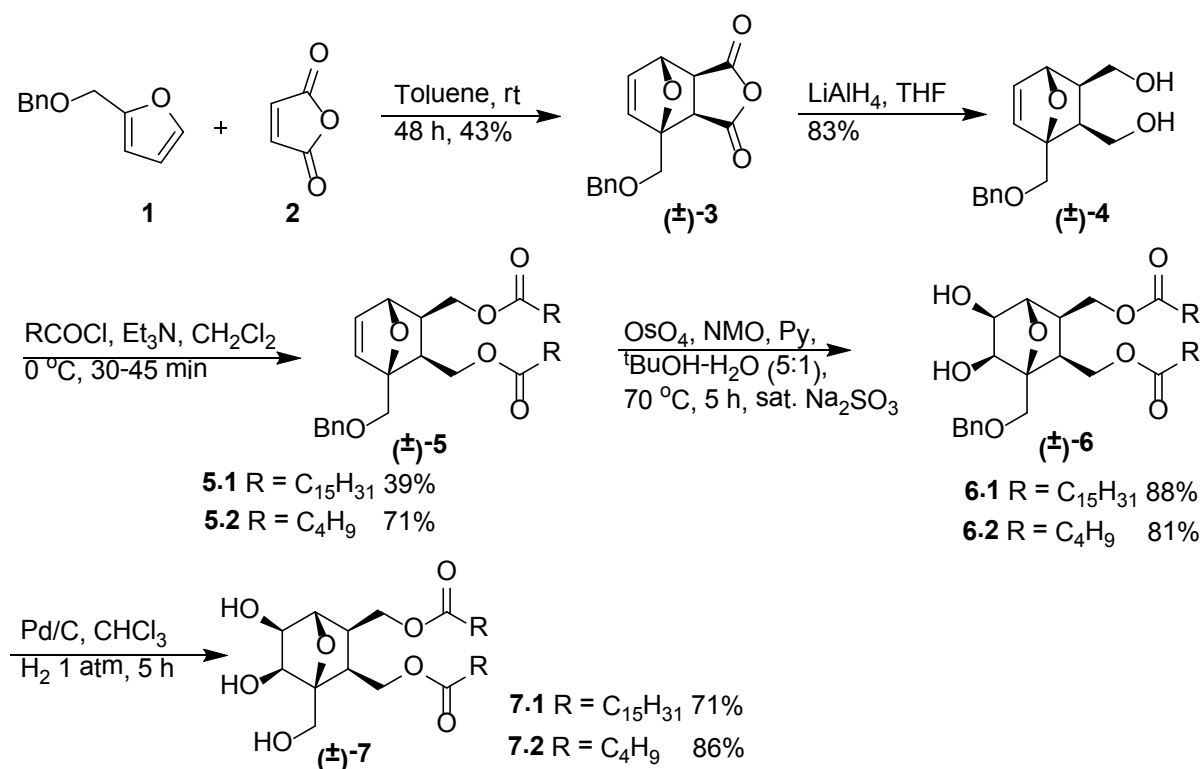

**Scheme 1.** Synthesis of dialkyl lipids ( $\pm$ )-**7.1** & **7.2**

### Experimental Procedure:

#### Preparation of ((1*RS*,2*SR*,4*RS*)-1-(benzyloxymethyl)-7-oxabicyclo[2.2.1]hept-5-ene-2,3-diyl)bis(methylene) dipalmitate ( $\pm$ )-**5**)

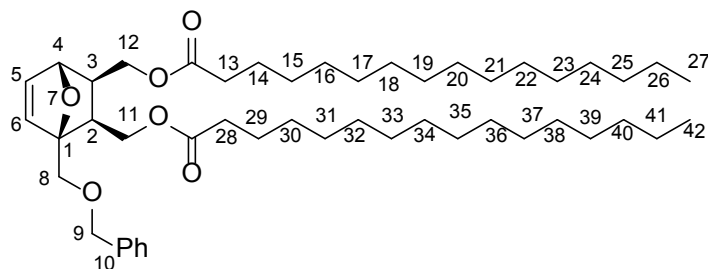

To a stirred solution of the alcohol ( $\pm$ )-**4** (1.0 eq) and Et<sub>3</sub>N (3.0 eq) in dry dichloromethane was added palmitoyl chloride (2.2 eq) at 0 °C

under N<sub>2</sub> atmosphere. The reaction mixture was warmed to room temperature and allowed to stir for 45mins. After completion of the reaction, the mixture was washed with water and extracted with dichloromethane. The organic layer was dried using sodium sulfate and evaporated under reduced pressure. The residue was purified by column chromatography on silica gel using 10-20% EtOAc/Hexane. Colorless solid; Yield = 49%; R<sub>f</sub> (20% EtOAc/Hexane), 0.50; <sup>1</sup>H NMR (CDCl<sub>3</sub>, 400 MHz): δ 7.33-7.28 (m, 5H, 10-H), 6.34-6.35 (m, 2H, 5-H, 6-H), 4.82 (s, 1H, 4-H), 4.69 (d, 1H, *J* = 12.0 Hz, 9-H<sub>a</sub>), 4.55 (d, 1H, *J* = 12.4 Hz, 9-H<sub>b</sub>), 4.39 (m, 1H, 11-H<sub>a</sub>), 4.17 (dd, 1H, *J* = 6.8, 11.6 Hz, 12-H<sub>a</sub>), 4.11 (dd, 1H, *J* = 6.0, 11.2 Hz, 12-H<sub>b</sub>), 3.97 (t, 1H, *J* = 10.0, 11-H<sub>b</sub>), 3.92 (d, 1H *J* = 10.8 Hz, 8-H<sub>a</sub>), 3.75 (d, 1H, *J* = 10.8 Hz, 8-H<sub>b</sub>), 2.32 (t, 2H, *J* = 7.2 Hz, 28-H), 2.24 (t, 2H, *J* = 7.6 Hz, 13-H), 2.12-2.07 (m, 2H, 2-H, 3-H), 1.65-1.54 (m, 4H, 14-H, 29-H), 1.25 (bs, 48H, 15-26-H, 30-41-H), 0.88 (t, 6H, *J* = 6.4 Hz, 27-H, 42-H); <sup>13</sup>C NMR (CDCl<sub>3</sub>, 100Hz): δ 173.7, 173.4, 137.9, 137.5, 135.6, 128.5 (2), 128.0 (2), 127.9, 90.0, 80.5, 73.8, 67.8, 63.7, 62.0, 41.4, 40.8, 34.4, 32.0 (2), 29.8 (9), 29.77 (2), 29.73 (2), 29.60 (2), 29.47 (2), 29.38 (2), 29.25 (2), 25.1, 24.9, 22.8 (2), 14.2 (2); IR (neat): 3055, 2926, 2857, 1734, 1458, 1265, 1172, 1105, 738 cm<sup>-1</sup>.

**Preparation of ((1RS,2SR,4SR,5RS,6SR)-1-(benzyloxymethyl)-5,6-dihydroxy-7-oxabicyclo[2.2.1]heptane-2,3-diyl)bis(methylene) dipalmitate ((±)-6)**

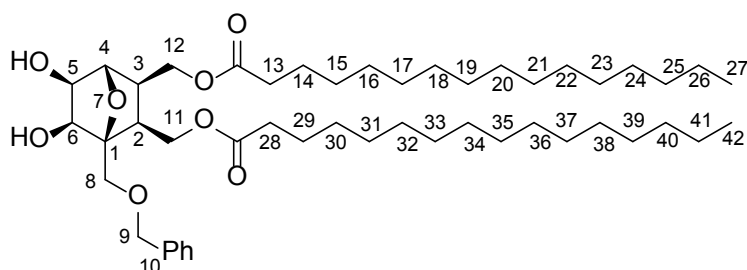

To a stirred solution containing a mixture of the alkene ((±)-5) 1.0 eq), N-Methyl morpholine N-Oxide (2.4 eq) and pyridine (30 uL for 100 mg of alkene) in <sup>t</sup>BuOH-H<sub>2</sub>O (3:1) was added osmium tetroxide (0.01eq, 0.02M solution) and it was heated at 80 °C for 5-6 h. After completion of the reaction, the mixture was cooled to room temperature, treated with 15% aq. Na<sub>2</sub>SO<sub>3</sub> solution (4 mL), stirred for 5-10 minutes and water (8 mL) was added to it. All the volatiles were removed under reduced pressure and the resulting residue was extracted with ethyl acetate. The organic layer was dried using sodium sulfate and evaporated under reduced pressure. The residue was purified by column chromatography on silica gel using Hexane-EtOAc solvent system. Colorless solid; Yield = 77%; R<sub>f</sub> (40% EtOAc-Hexane), 0.35; <sup>1</sup>H NMR (CDCl<sub>3</sub>, 400 MHz): δ 7.39-7.31 (m, 5H, 10-H), 4.65 (d, 1H, *J* = 11.6 Hz, 9-H<sub>a</sub>), 4.58 (d, 1H, *J* = 12.0 Hz, 9-H<sub>b</sub>), 4.26 (s, 1H, 4-H), 4.25 (dd, 1H, 11-H<sub>a</sub>, merged with 4-H), 4.18

(dd, 1H,  $J = 7.2, 11.6$  Hz, 12-**H<sub>a</sub>**), 4.04-3.99 (m, 2H, -**OH**, 12-**H<sub>b</sub>**), 3.94 (m, 1H, 11-**H<sub>b</sub>**), 3.92 (s, 2H, 5-**H**, 6-**H**), 3.93-3.87 (m, 2H, 8-**H**), 3.28 (d, 1H,  $J = 5.6$  Hz, -**OH**), 2.30 (t, 2H,  $J = 7.2$  Hz, 28-**H**), 2.25 (t, 2H,  $J = 7.2$  Hz, 13-**H**), 2.22-2.17 (m, 1H, 3-**H**), 2.14-2.07 (m, 1H, 2-**H**) 1.63-1.56 (bs, 4H, 14-**H**, 29-**H**), 1.26 (bs, 48H, 15-26-**H**, 30-41-**H**), 0.88 (t, 6H,  $J = 6.8$  Hz, 27-**H**, 42-**H**);  $^{13}\text{C}$  NMR ( $\text{CDCl}_3$ , 100 MHz):  $\delta$  173.6, 173.3, 136.9, 128.6 (2C), 128.2, 128.0 (2C), 86.6, 84.1, 75.7, 74.3, 73.9, 66.8, 61.9, 60.7, 42.0, 40.9, 34.2 (2C), 31.9 (2C), 29.7 (8C), 29.6 (4C), 29.5 (2C), 29.3 (2C), 29.2 (2C), 29.1 (2C), 24.9, 24.8, 22.7 (2C), 14.1 (2C); IR (neat): 3455, 3055, 2926, 2857, 1734, 1458, 1265, 1172, 1105, 996, 738  $\text{cm}^{-1}$ ; HRMS (ESI) exact mass calcd. for  $\text{C}_{48}\text{H}_{82}\text{O}_8$  ( $\text{M}+\text{Na}$ ) $^+$  809.5907, found ( $\text{M}+\text{Na}$ ) $^+$  809.5906.

**Preparation of ((1R,2S,4S,5R,6S)-5,6-dihydroxy-1-(hydroxymethyl)-7-oxabicyclo[2.2.1]heptane-2,3-diyl)bis(methylene) dipalmitate ((±)-7)**

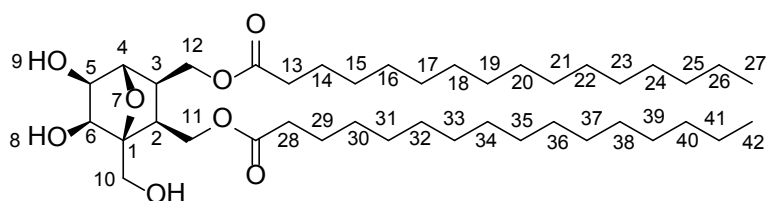

A mixture of the benzyl ether ((±)-**6**) and 10% Pd/C (20% w/w) in  $\text{CHCl}_3$  was stirred under hydrogen atmosphere ( $\text{H}_2$  balloon) at room

temperature for 5 h. After completion of the reaction, the resulting mixture was filtered through a celite bed and the solvent was evaporated under reduced pressure. The resulting solid was purified by column chromatography using EtOAc-Hexanes as solvent system in a gradient mode. Colorless solid; Yield = 72%;  $R_f$  (EtOAc), 0.60;  $^1\text{H}$  NMR ( $\text{CDCl}_3$ , 400 MHz):  $\delta$  4.52 (bs, 1H, -**OH**), 4.24 (s, 1H, 4-**H**), 4.20 (dd, 1H,  $J = 5.2, 10.8$  Hz, 12-**H<sub>a</sub>**), 4.16-4.03 (m, 4H, 10-**H**, 11-**H**), 4.01-3.90 (m, 3H, 5-**H**, 6-**H**, 12-**H<sub>b</sub>**), 3.75 (bs, 1H, -**OH**), 3.40 (bs, 1H, -**OH**), 2.36-2.28 (m, 4H, 13-**H**, 28-**H**), 2.23 (ddd, 1H,  $J = 5.6, 9.6, 9.6$  Hz, 3-**H**), 2.16-2.09 (m, 1H, 2-**H**), 1.65-1.56 (m, 4H, 14-**H**, 29-**H**), 1.26 (bs, 48H, 15-26-**H**, 30-41-**H**), 0.88 (t, 6H,  $J = 6.4$  Hz, 27-**H**, 42-**H**);  $^{13}\text{C}$  NMR ( $\text{CDCl}_3$ , 100 MHz):  $\delta$  173.6, 173.3, 87.7, 83.5, 76.1, 74.0, 61.8, 60.6, 59.9, 41.9, 40.9, 34.2 (2C), 31.9 (2C), 29.73 (8C), 29.69 (4C), 29.5 (2C), 29.4 (2C), 29.3 (2C), 29.2 (2C), 24.92, 24.85, 22.7 (2C), 14.2 (2C); IR (neat): 3338, 2920, 2852, 1730, 1462, 1174, 1020, 826, 724  $\text{cm}^{-1}$ ; HRMS (ESI) exact mass calcd. for  $\text{C}_{41}\text{H}_{76}\text{O}_8\text{Na}$  ( $\text{M}+\text{Na}$ ) $^+$  719.5438, found ( $\text{M}+\text{Na}$ ) $^+$  719.5430.

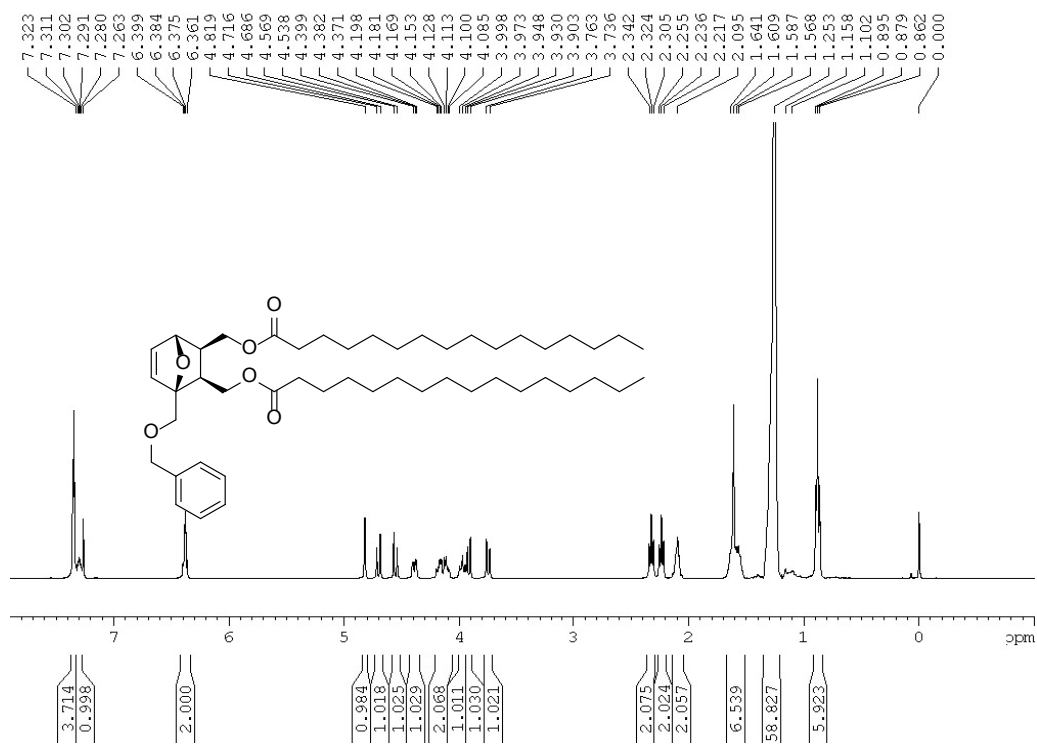

**<sup>1</sup>H NMR (400 MHz) spectrum of (±)-5**

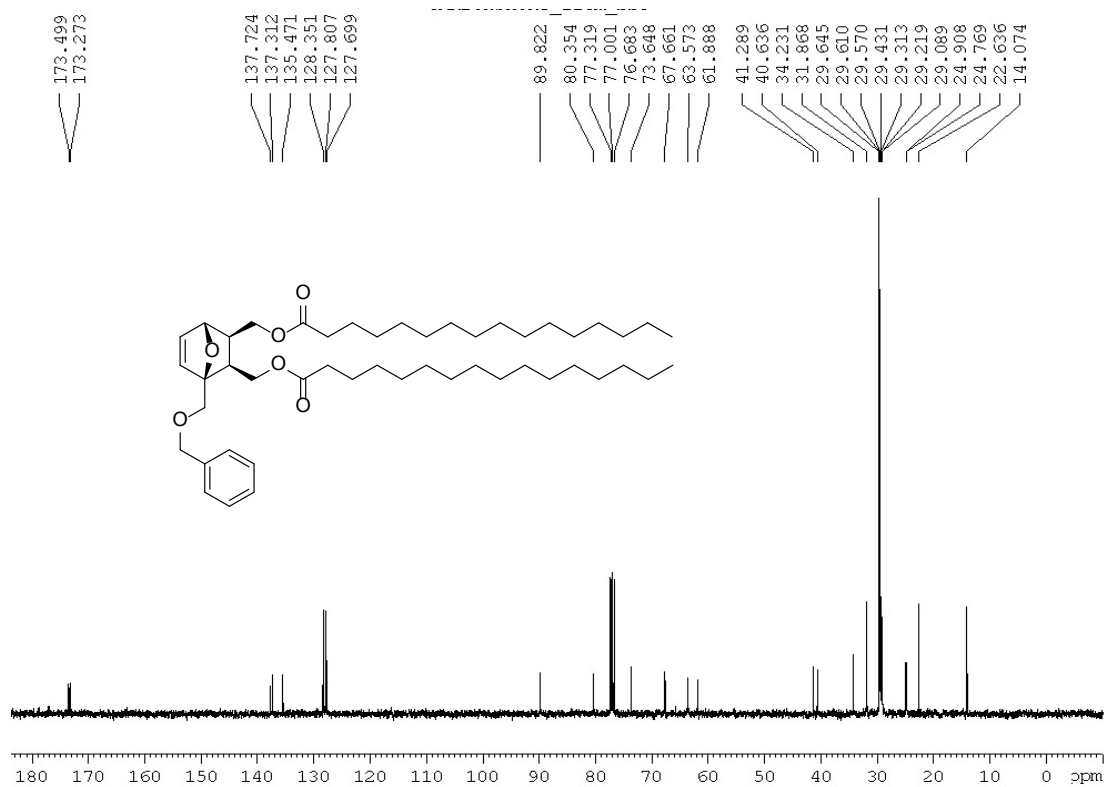

**<sup>13</sup>C NMR (100 MHz) spectrum of (±)-5**

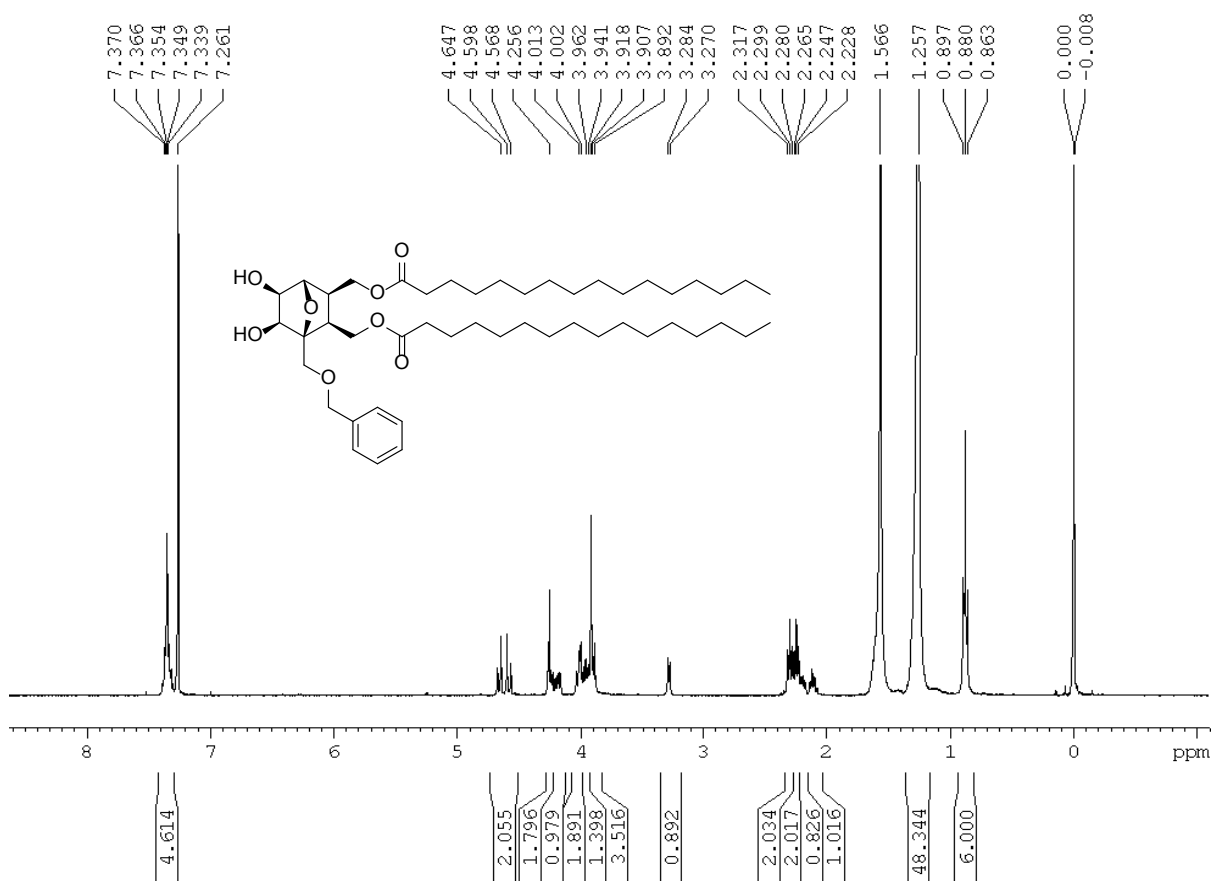

<sup>1</sup>H NMR (400 MHz) spectrum of (±)-6

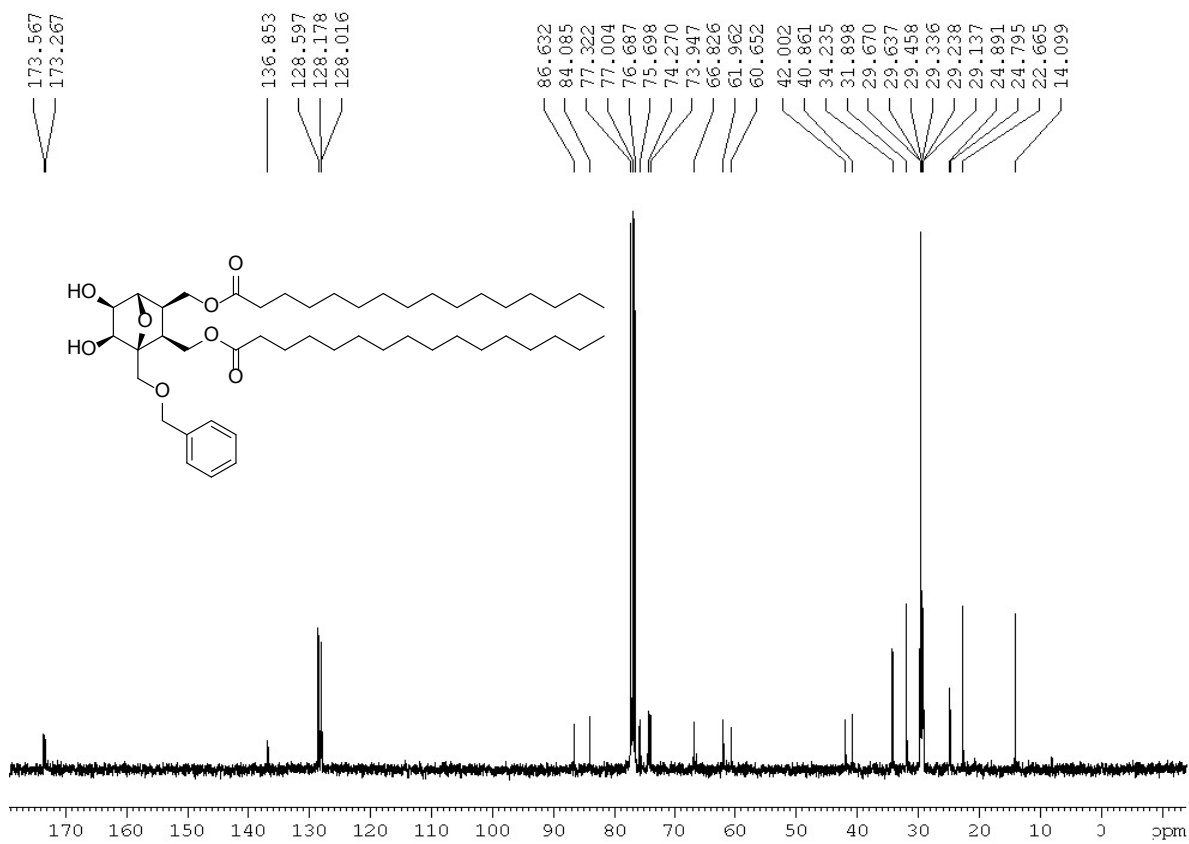

<sup>13</sup>C NMR (100 MHz) spectrum of (±)-6

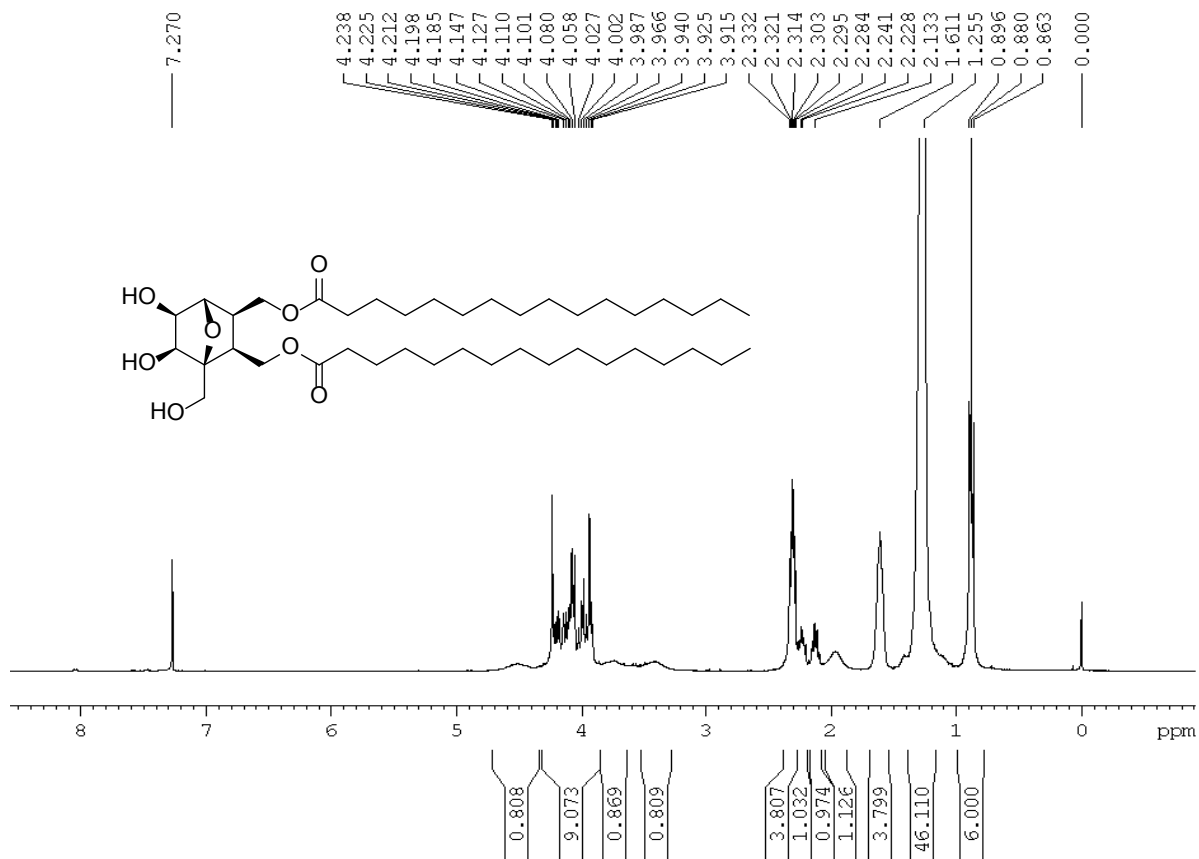

<sup>1</sup>H NMR (400 MHz) spectrum of (±)-7

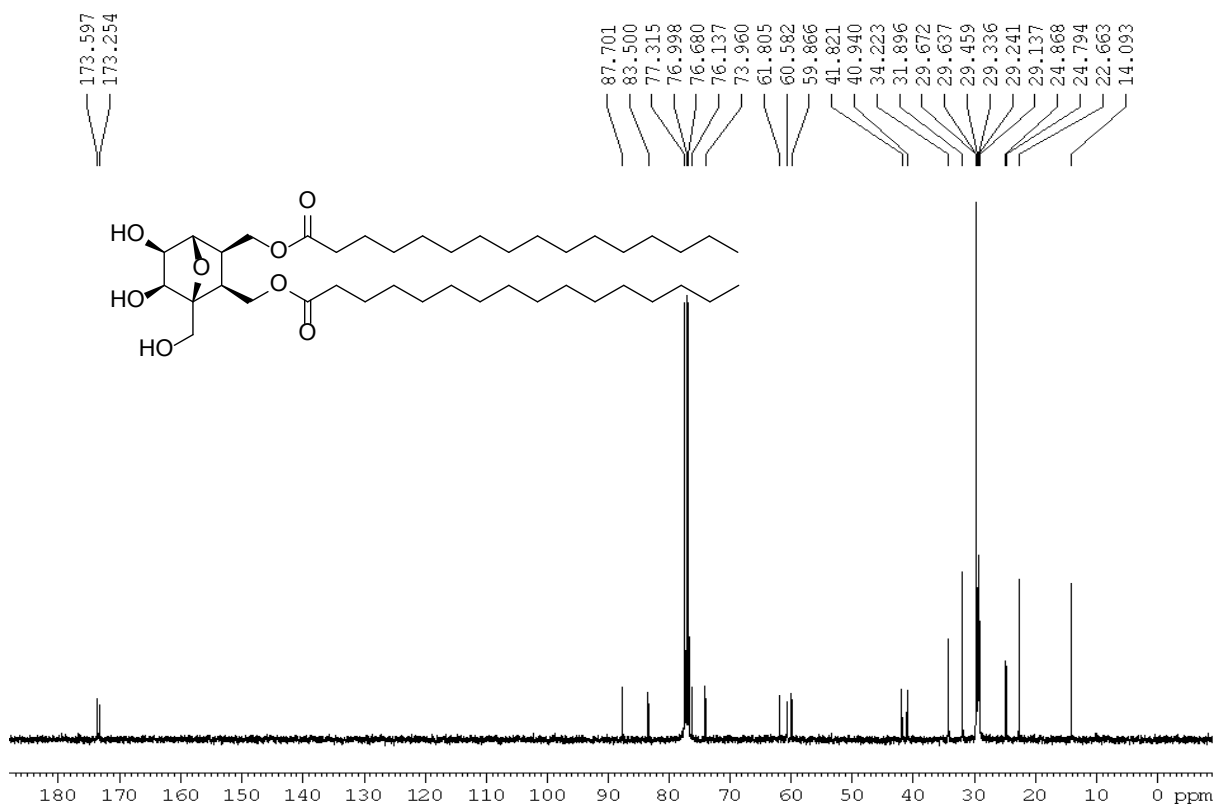

<sup>13</sup>C NMR (100 MHz) spectrum of (±)-7

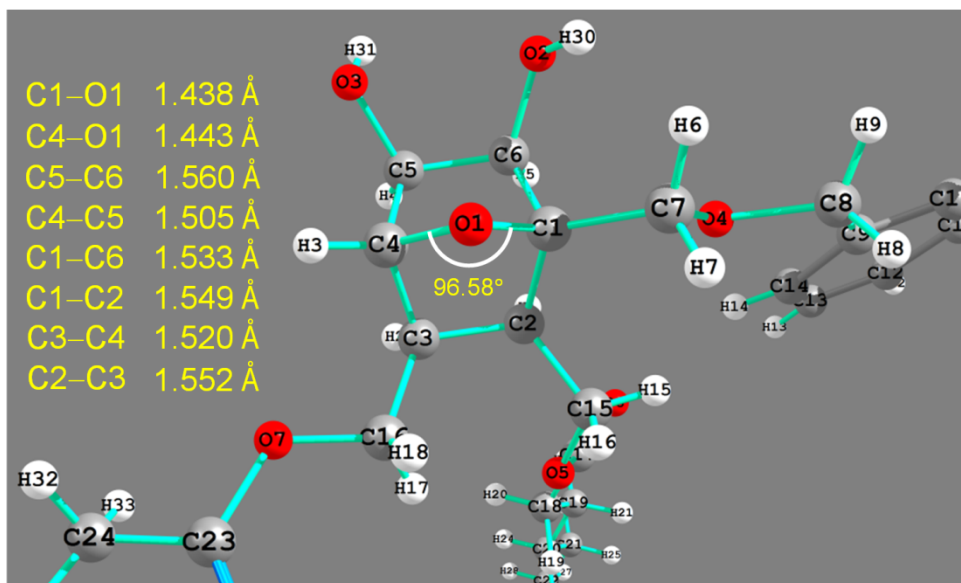

**Figure S1.** Geometrical parameters for the Oxanorbornane head.

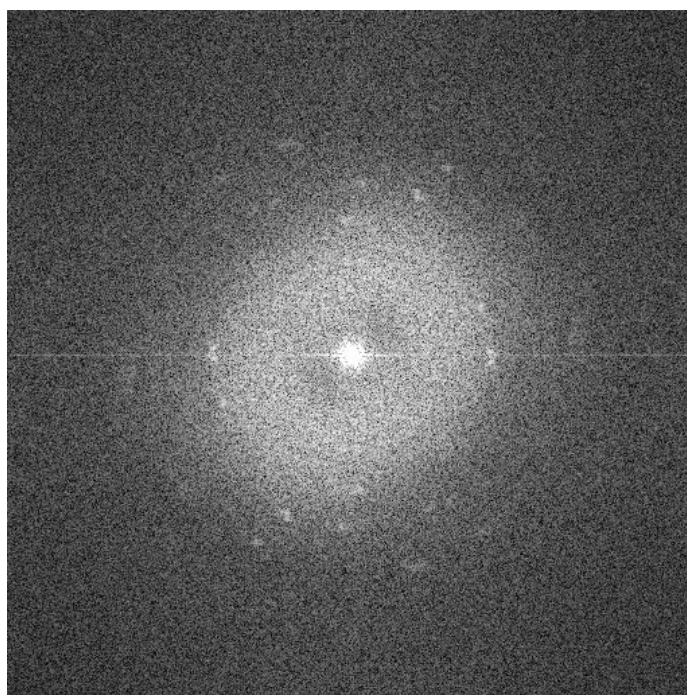

**Figure S2.** Selective Area Electron Diffraction (SAED) pattern of the surface micelles deposited by Langmuir Schaeffer method at 40 mN/m.

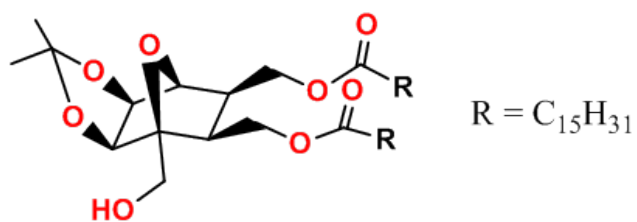

**Figure S3a.** Chemical Structure of ketal protected 1a.

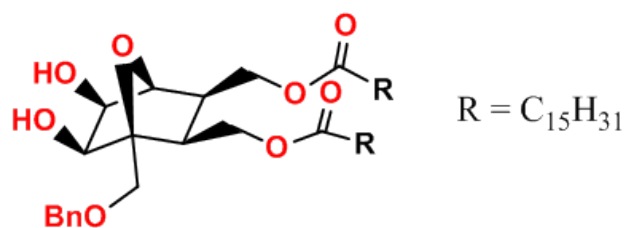

**Figure S3b.** Chemical Structure of Benzyl protected 1a.

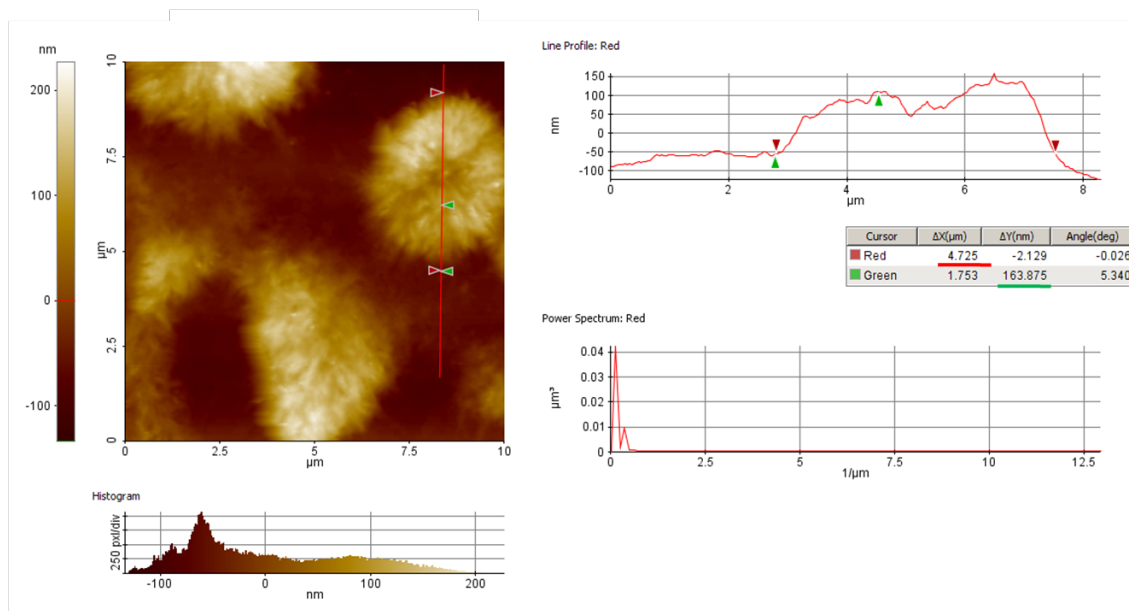

**Figure S4.** 3-D micro flowers formed by 1mM of benzyl protected 1a in  $\text{CHCl}_3$  after 3 days; non-contact imaging was done at a scan rate of 1Hz. In the line profile, the width and height of the microflower of interest is underlined with red and green colored lines.



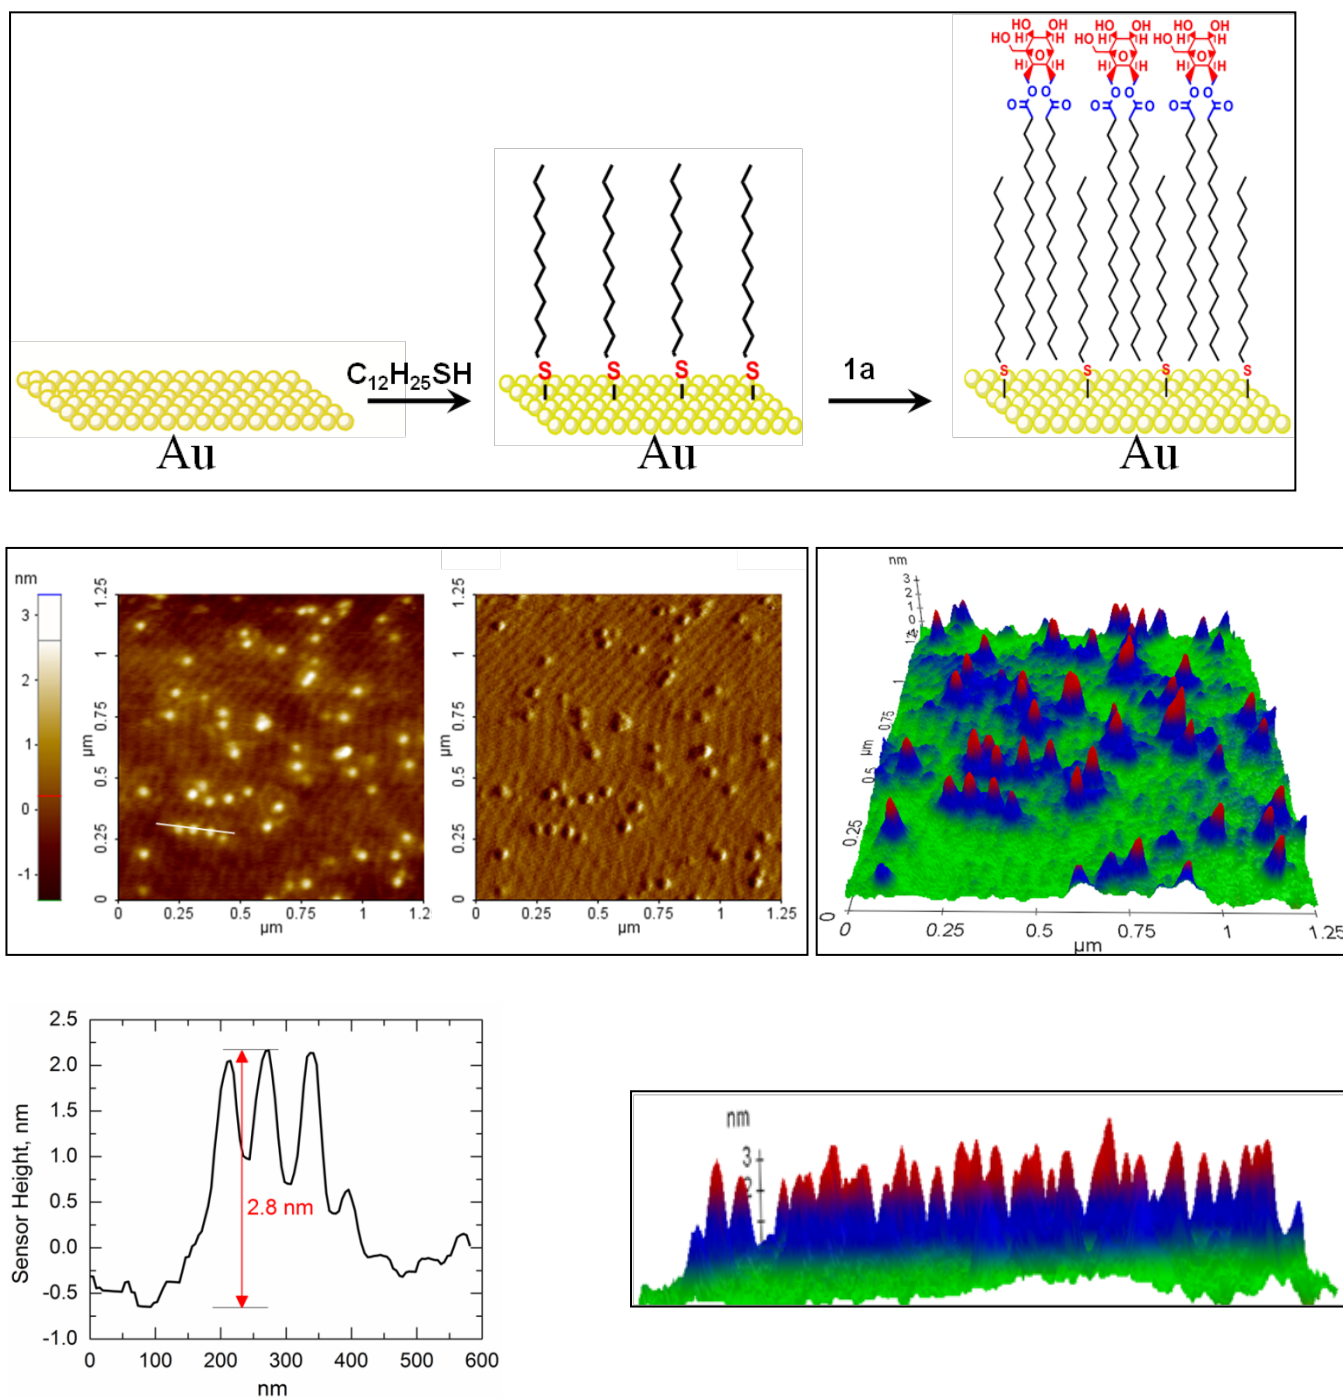

**Figure S5.** Embedding 1a onto dodecanethiol chemisorbed Au(111) surface. The electrode was fabricated in  $CHCl_3$  and  $CH_3OH$  (1/4, v/v) solution. AFM images and line profile shows the sensor height.

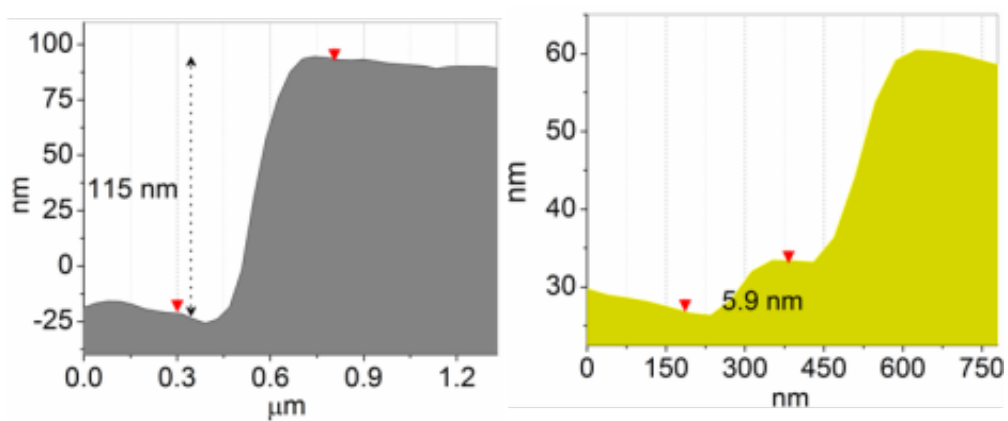

**Figure S6.** Line profiles indicate the vertical dimensions of the square and rectangular sheets. 5.9 nm corresponds to 1a bilayer height.

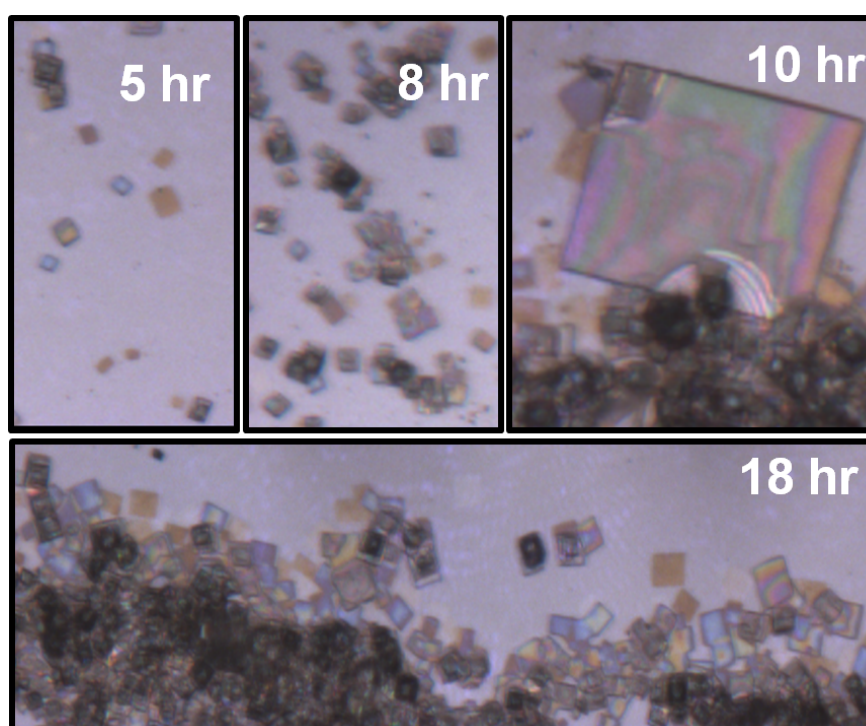

**Figure S7.** Single crystalline square nanosheets grown on ITO substrates at different incubation times in  $\text{CH}_3\text{OH}/\text{CHCl}_3$  (1/1 v/v). Different contrasts (from light to dark colour) indicate increasing heights of the nanosheets.

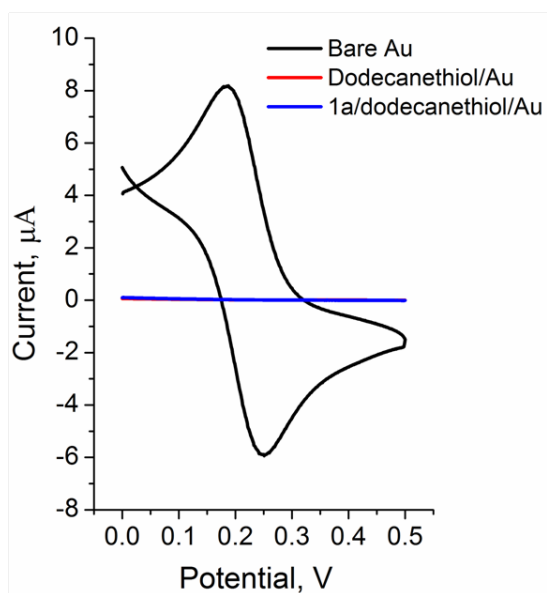

**Figure S8.** Cyclic Voltammograms of 1mM  $\text{Fe}(\text{CN})_6^{4-/3-}$  in 0.01M TRIS buffer (pH 7.4) containing 0.1M KCl as supporting electrolyte at bare Au electrode (in black), dodecanethiol-SAM modified Au electrode (in red) and at 1a/SAM/Au electrode (in blue).

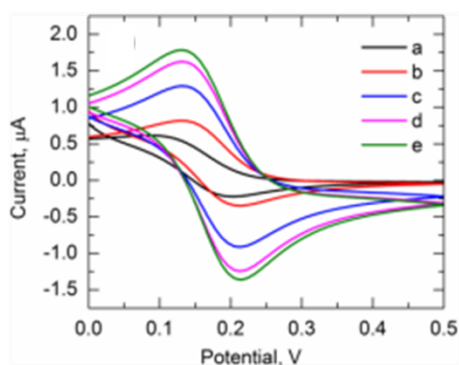

**Figure S9.** CV response of 1mM  $\text{Fe}(\text{CN})_6^{4-/3-}$  buffered solutions of pH 7.4 with 0.1M KCl as supporting electrolyte containing the same concentrations of  $\text{Li}^+$  described for impedance measurements.

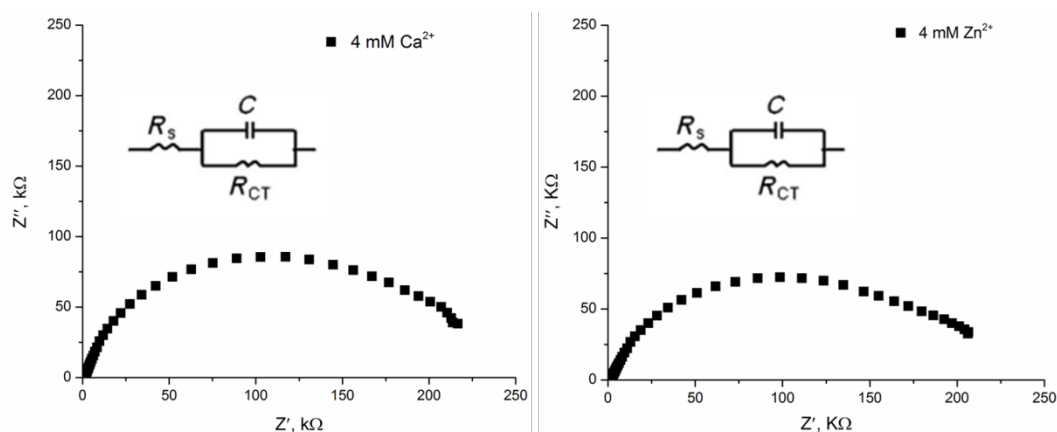

**Figure S10.** Impedance response of  $\text{Fe}(\text{CN})_6^{4-/3-}$  at the 1a/SAM/Au electrode in the presence of 4 mM  $\text{Ca}^{2+}$  and  $\text{Zn}^{2+}$  ions. Plots were recorded in 0.01M TRIS buffer (pH 7.4) containing 1mM  $\text{Fe}(\text{CN})_6^{4-/3-}$  as internal standard and 0.1M KCl as the supporting electrolyte.

### Ab-initio Molecular dynamics (Atom-centered density matrix propagation, ADMP)

#### Cartesian Coordinates at 0 fs

| Center Number | Atomic Number | Atomic Type | Coordinates (Angstroms) |           |           |
|---------------|---------------|-------------|-------------------------|-----------|-----------|
|               |               |             | X                       | Y         | Z         |
| 1             | 6             | 0           | 0.186316                | 0.738659  | 0.517121  |
| 2             | 6             | 0           | 1.353201                | 1.614168  | -0.064122 |
| 3             | 1             | 0           | 1.031853                | 2.166019  | -0.921974 |
| 4             | 6             | 0           | 2.393508                | 0.501373  | -0.456056 |
| 5             | 1             | 0           | 2.652167                | 0.560668  | -1.488868 |
| 6             | 6             | 0           | 1.582015                | -0.777025 | -0.154798 |
| 7             | 1             | 0           | 2.179646                | -1.665875 | 0.019335  |
| 8             | 6             | 0           | 0.452091                | -0.944670 | -1.192051 |
| 9             | 1             | 0           | 0.778102                | -0.780286 | -2.216579 |
| 10            | 6             | 0           | -0.564527               | 0.141649  | -0.718278 |
| 11            | 1             | 0           | -0.759309               | 0.887411  | -1.490867 |
| 12            | 6             | 0           | -0.744806               | 1.298658  | 1.594088  |
| 13            | 1             | 0           | -1.027877               | 0.480088  | 2.262315  |
| 14            | 1             | 0           | -0.257891               | 2.075284  | 2.194598  |

|    |   |   |           |           |           |
|----|---|---|-----------|-----------|-----------|
| 15 | 8 | 0 | 0.852850  | -0.431514 | 1.035605  |
| 16 | 8 | 0 | -1.817122 | -0.470107 | -0.343736 |
| 17 | 8 | 0 | -0.171903 | -2.254716 | -1.108522 |
| 18 | 8 | 0 | -1.902712 | 1.831611  | 0.925539  |
| 19 | 1 | 0 | -2.381069 | 2.442802  | 1.509840  |
| 20 | 1 | 0 | -2.356857 | 0.261569  | 0.033244  |
| 21 | 3 | 0 | -1.800525 | -2.291064 | -0.241019 |
| 22 | 1 | 0 | 0.418873  | -2.916244 | -1.499365 |
| 23 | 1 | 0 | 3.269742  | 0.558632  | 0.160552  |
| 24 | 1 | 0 | 1.756764  | 2.269579  | 0.684233  |

---

### Cartesian Coordinates at 50 fs

---

| Center<br>Number | Atomic<br>Number | Atomic<br>Type | Coordinates (Angstroms) |           |           |
|------------------|------------------|----------------|-------------------------|-----------|-----------|
|                  |                  |                | X                       | Y         | Z         |
| 1                | 6                | 0              | 0.251035                | 0.766693  | 0.500163  |
| 2                | 6                | 0              | 1.477266                | 1.600708  | -0.000312 |
| 3                | 1                | 0              | 1.187117                | 2.493578  | -0.664571 |
| 4                | 6                | 0              | 2.385570                | 0.465833  | -0.470764 |
| 5                | 1                | 0              | 2.959386                | 0.335057  | -1.450164 |
| 6                | 6                | 0              | 1.585598                | -0.755976 | -0.093161 |
| 7                | 1                | 0              | 2.167373                | -1.732375 | 0.028585  |
| 8                | 6                | 0              | 0.453788                | -0.960483 | -1.226121 |
| 9                | 1                | 0              | 0.893951                | -0.618752 | -2.238046 |
| 10               | 6                | 0              | -0.631008               | 0.154864  | -0.681166 |
| 11               | 1                | 0              | -0.913028               | 0.948087  | -1.471030 |
| 12               | 6                | 0              | -0.681242               | 1.529386  | 1.536388  |
| 13               | 1                | 0              | -0.796951               | 0.940007  | 2.468552  |
| 14               | 1                | 0              | -0.107888               | 2.473588  | 1.802291  |
| 15               | 8                | 0              | 0.849553                | -0.379833 | 1.072293  |
| 16               | 8                | 0              | -1.800792               | -0.623555 | -0.380544 |
| 17               | 8                | 0              | -0.214395               | -2.222128 | -1.271479 |
| 18               | 8                | 0              | -1.978838               | 1.797048  | 0.988624  |
| 19               | 1                | 0              | -2.727481               | 2.101464  | 1.622399  |
| 20               | 1                | 0              | -2.417145               | 0.067899  | 0.048464  |

|    |   |   |           |           |           |
|----|---|---|-----------|-----------|-----------|
| 21 | 3 | 0 | -1.956937 | -2.494463 | -0.202329 |
| 22 | 1 | 0 | 0.452213  | -2.948365 | -1.187789 |
| 23 | 1 | 0 | 3.298408  | 0.513458  | 0.216914  |
| 24 | 1 | 0 | 1.891340  | 2.111139  | 0.922622  |

---

### Cartesian Coordinates at 100 fs

---

| Center<br>Number | Atomic<br>Number | Atomic<br>Type | Coordinates (Angstroms) |           |           |
|------------------|------------------|----------------|-------------------------|-----------|-----------|
|                  |                  |                | X                       | Y         | Z         |
| 1                | 6                | 0              | 0.171950                | 0.832822  | 0.441156  |
| 2                | 6                | 0              | 1.400246                | 1.581245  | -0.153588 |
| 3                | 1                | 0              | 1.229249                | 2.103172  | -1.035763 |
| 4                | 6                | 0              | 2.400093                | 0.409131  | -0.390073 |
| 5                | 1                | 0              | 2.912000                | 0.457233  | -1.302979 |
| 6                | 6                | 0              | 1.521161                | -0.840559 | -0.103480 |
| 7                | 1                | 0              | 1.879954                | -1.826846 | -0.047093 |
| 8                | 6                | 0              | 0.504327                | -0.949102 | -1.194020 |
| 9                | 1                | 0              | 0.867739                | -0.653929 | -2.209427 |
| 10               | 6                | 0              | -0.545003               | 0.206131  | -0.722215 |
| 11               | 1                | 0              | -0.674528               | 0.734419  | -1.613320 |
| 12               | 6                | 0              | -0.676136               | 1.491809  | 1.515972  |
| 13               | 1                | 0              | -0.772238               | 0.817238  | 2.364089  |
| 14               | 1                | 0              | -0.153153               | 2.371762  | 1.781831  |
| 15               | 8                | 0              | 0.682086                | -0.478029 | 1.029813  |
| 16               | 8                | 0              | -1.764313               | -0.388756 | -0.287864 |
| 17               | 8                | 0              | -0.091309               | -2.235255 | -1.220767 |
| 18               | 8                | 0              | -2.014005               | 1.724688  | 1.061542  |
| 19               | 1                | 0              | -2.570849               | 1.994675  | 1.729302  |
| 20               | 1                | 0              | -2.232002               | 0.389813  | 0.240702  |
| 21               | 3                | 0              | -1.710560               | -2.471905 | -0.114056 |
| 22               | 1                | 0              | 0.271782                | -2.637258 | -2.009597 |
| 23               | 1                | 0              | 3.169964                | 0.451835  | 0.335232  |
| 24               | 1                | 0              | 1.694184                | 2.342457  | 0.531246  |

---

### Cartesian Coordinates at 150 fs

---

| Center<br>Number | Atomic<br>Number | Atomic<br>Type | Coordinates (Angstroms) |           |           |
|------------------|------------------|----------------|-------------------------|-----------|-----------|
|                  |                  |                | X                       | Y         | Z         |
| 1                | 6                | 0              | 0.189913                | 0.784603  | 0.529262  |
| 2                | 6                | 0              | 1.389975                | 1.566498  | -0.082380 |
| 3                | 1                | 0              | 1.171607                | 2.113236  | -1.108722 |
| 4                | 6                | 0              | 2.375063                | 0.411305  | -0.354823 |
| 5                | 1                | 0              | 2.738292                | 0.495883  | -1.459805 |
| 6                | 6                | 0              | 1.575310                | -0.794370 | -0.067153 |
| 7                | 1                | 0              | 2.117502                | -1.802493 | 0.093803  |
| 8                | 6                | 0              | 0.447365                | -0.925303 | -1.168746 |
| 9                | 1                | 0              | 0.775293                | -0.563704 | -2.132886 |
| 10               | 6                | 0              | -0.586642               | 0.140780  | -0.733261 |
| 11               | 1                | 0              | -0.651332               | 0.854424  | -1.647226 |
| 12               | 6                | 0              | -0.619264               | 1.489612  | 1.518922  |
| 13               | 1                | 0              | -0.803742               | 0.797279  | 2.341285  |
| 14               | 1                | 0              | -0.094593               | 2.443214  | 1.920488  |
| 15               | 8                | 0              | 0.783722                | -0.433544 | 1.007270  |
| 16               | 8                | 0              | -1.843172               | -0.507530 | -0.551195 |
| 17               | 8                | 0              | -0.092214               | -2.198981 | -1.262007 |
| 18               | 8                | 0              | -1.987605               | 1.738201  | 1.031616  |
| 19               | 1                | 0              | -2.486742               | 2.100722  | 1.879097  |
| 20               | 1                | 0              | -2.374773               | 0.268093  | -0.108008 |
| 21               | 3                | 0              | -1.648500               | -2.419596 | 0.243582  |
| 22               | 1                | 0              | -0.832354               | -2.057641 | -1.920505 |
| 23               | 1                | 0              | 3.217613                | 0.323070  | 0.423392  |
| 24               | 1                | 0              | 1.705711                | 2.291996  | 0.706393  |

---

### Cartesian Coordinates at 200 fs

---

| Center<br>Number | Atomic<br>Number | Atomic<br>Type | Coordinates (Angstroms) |   |   |
|------------------|------------------|----------------|-------------------------|---|---|
|                  |                  |                | X                       | Y | Z |

---

|    |   |   |           |           |           |
|----|---|---|-----------|-----------|-----------|
| 1  | 6 | 0 | 0.181944  | 0.790532  | 0.464135  |
| 2  | 6 | 0 | 1.522447  | 1.606252  | 0.142691  |
| 3  | 1 | 0 | 1.351759  | 2.431649  | -0.449701 |
| 4  | 6 | 0 | 2.395000  | 0.461216  | -0.436304 |
| 5  | 1 | 0 | 2.637484  | 0.671127  | -1.446205 |
| 6  | 6 | 0 | 1.522749  | -0.863069 | -0.188450 |
| 7  | 1 | 0 | 2.044496  | -1.757607 | -0.199724 |
| 8  | 6 | 0 | 0.440858  | -0.951069 | -1.271397 |
| 9  | 1 | 0 | 0.836687  | -0.836284 | -2.316577 |
| 10 | 6 | 0 | -0.563327 | 0.210391  | -0.792573 |
| 11 | 1 | 0 | -0.803144 | 1.007464  | -1.433411 |
| 12 | 6 | 0 | -0.788441 | 1.327483  | 1.477781  |
| 13 | 1 | 0 | -0.901099 | 0.583833  | 2.314820  |
| 14 | 1 | 0 | -0.314690 | 2.167209  | 1.908400  |
| 15 | 8 | 0 | 0.754845  | -0.481373 | 0.982712  |
| 16 | 8 | 0 | -1.820474 | -0.441176 | -0.422088 |
| 17 | 8 | 0 | -0.187197 | -2.262156 | -1.149457 |
| 18 | 8 | 0 | -2.015655 | 1.804051  | 0.931745  |
| 19 | 1 | 0 | -2.620847 | 2.001312  | 1.591076  |
| 20 | 1 | 0 | -2.322805 | 0.376851  | 0.005024  |
| 21 | 3 | 0 | -1.249998 | -2.171990 | 0.361426  |
| 22 | 1 | 0 | -0.469602 | -2.522554 | -2.016765 |
| 23 | 1 | 0 | 3.255514  | 0.243436  | 0.132991  |
| 24 | 1 | 0 | 1.785507  | 1.925619  | 1.144862  |

---

**Cartesian Coordinates at 250 fs**

---

| Center<br>Number | Atomic<br>Number | Atomic<br>Type | Coordinates (Angstroms) |          |           |
|------------------|------------------|----------------|-------------------------|----------|-----------|
|                  |                  |                | X                       | Y        | Z         |
| 1                | 6                | 0              | 0.151604                | 0.650150 | 0.569635  |
| 2                | 6                | 0              | 1.324098                | 1.562557 | 0.099446  |
| 3                | 1                | 0              | 0.752901                | 2.357053 | -0.554532 |
| 4                | 6                | 0              | 2.287727                | 0.517710 | -0.401919 |
| 5                | 1                | 0              | 2.643321                | 0.552257 | -1.496946 |



|    |   |   |           |           |           |
|----|---|---|-----------|-----------|-----------|
| 6  | 6 | 0 | 1.547379  | -0.811911 | -0.208774 |
| 7  | 1 | 0 | 2.247438  | -1.723649 | -0.299071 |
| 8  | 6 | 0 | 0.446903  | -0.914479 | -1.351202 |
| 9  | 1 | 0 | 0.706297  | -0.843019 | -2.414904 |
| 10 | 6 | 0 | -0.540039 | 0.224757  | -0.833060 |
| 11 | 1 | 0 | -0.764793 | 1.196989  | -1.435671 |
| 12 | 6 | 0 | -0.804357 | 1.197206  | 1.560693  |
| 13 | 1 | 0 | -1.155850 | 0.400580  | 2.161850  |
| 14 | 1 | 0 | -0.340704 | 1.919377  | 2.318123  |
| 15 | 8 | 0 | 0.734059  | -0.638300 | 0.987327  |
| 16 | 8 | 0 | -1.769873 | -0.399506 | -0.543621 |
| 17 | 8 | 0 | -0.089572 | -2.205952 | -1.194237 |
| 18 | 8 | 0 | -1.848169 | 1.883303  | 0.826926  |
| 19 | 1 | 0 | -2.477055 | 2.395768  | 1.444280  |
| 20 | 1 | 0 | -2.316719 | 0.361917  | -0.155062 |
| 21 | 3 | 0 | -1.248658 | -2.048154 | 0.947290  |
| 22 | 1 | 0 | -0.942954 | -2.276695 | -1.733415 |
| 23 | 1 | 0 | 3.283550  | 0.476002  | 0.130850  |
| 24 | 1 | 0 | 1.701034  | 2.147277  | 0.956979  |

-----  
**Cartesian Coordinates at 300 fs**  
-----

| Center<br>Number | Atomic<br>Number | Atomic<br>Type | Coordinates (Angstroms) |           |           |
|------------------|------------------|----------------|-------------------------|-----------|-----------|
|                  |                  |                | X                       | Y         | Z         |
| 1                | 6                | 0              | 0.051119                | 0.646222  | 0.516340  |
| 2                | 6                | 0              | 1.333817                | 1.517500  | 0.160631  |
| 3                | 1                | 0              | 1.108683                | 2.217251  | -0.632053 |
| 4                | 6                | 0              | 2.351838                | 0.514122  | -0.349959 |
| 5                | 1                | 0              | 2.660883                | 0.768859  | -1.369734 |
| 6                | 6                | 0              | 1.515694                | -0.813987 | -0.212688 |
| 7                | 1                | 0              | 2.024103                | -1.724842 | -0.171042 |
| 8                | 6                | 0              | 0.414061                | -0.889886 | -1.279937 |
| 9                | 1                | 0              | 0.668247                | -0.781926 | -2.362192 |
| 10               | 6                | 0              | -0.581506               | 0.175609  | -0.861080 |
| 11               | 1                | 0              | -0.705296               | 0.873427  | -1.656621 |

|    |   |   |           |           |           |
|----|---|---|-----------|-----------|-----------|
| 12 | 6 | 0 | -0.864426 | 1.178170  | 1.493780  |
| 13 | 1 | 0 | -1.445911 | 0.220627  | 1.806169  |
| 14 | 1 | 0 | -0.358416 | 1.579054  | 2.344607  |
| 15 | 8 | 0 | 0.745906  | -0.560316 | 0.981985  |
| 16 | 8 | 0 | -1.855350 | -0.488757 | -0.612195 |
| 17 | 8 | 0 | -0.165103 | -2.238506 | -1.144020 |
| 18 | 8 | 0 | -1.766735 | 2.099215  | 0.911494  |
| 19 | 1 | 0 | -2.306752 | 2.407487  | 1.650936  |
| 20 | 1 | 0 | -2.445752 | 0.161302  | -0.329615 |
| 21 | 3 | 0 | -0.720591 | -2.130828 | 0.737559  |
| 22 | 1 | 0 | -1.040049 | -2.247464 | -1.489658 |
| 23 | 1 | 0 | 3.276819  | 0.362019  | 0.191351  |
| 24 | 1 | 0 | 1.593288  | 2.142121  | 1.050151  |

**Figure S11.** ADMP Potential energy evolution with time for "1a-lithium" tridentate complex calculated at b3lyp/6-31G(d) level of theory. Time evolution of the Lithium ion migration from bidentate to tridentate is given in the form of molecular geometries as well as cartesian coordinates.

### Molecular structure and Coordinates for SDS devoid of an alkyl chain

| Center Number | Atomic Number | Atomic Type | Coordinates (Angstroms) |           |           |
|---------------|---------------|-------------|-------------------------|-----------|-----------|
|               |               |             | X                       | Y         | Z         |
| 1             | 16            | 0           | -0.516579               | -0.054946 | 0.000021  |
| 2             | 8             | 0           | -0.449488               | -0.855695 | 1.245278  |
| 3             | 8             | 0           | -0.449419               | -0.856126 | -1.244990 |
| 4             | 8             | 0           | -1.496968               | 1.044971  | -0.000253 |
| 5             | 6             | 0           | 2.100307                | 0.016271  | -0.000043 |
| 6             | 1             | 0           | 2.969948                | 0.686604  | -0.000057 |
| 7             | 1             | 0           | 2.138620                | -0.623964 | 0.892687  |
| 8             | 1             | 0           | 2.138660                | -0.623926 | -0.892782 |
| 9             | 8             | 0           | 0.947898                | 0.834698  | -0.000025 |

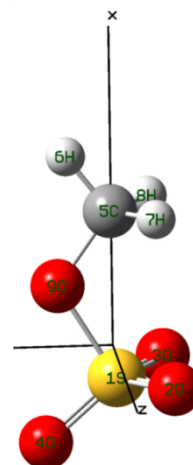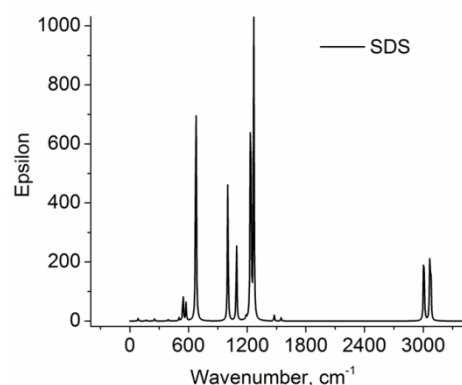

## Molecular structure and Coordinates for 1b devoid of alkyl chains

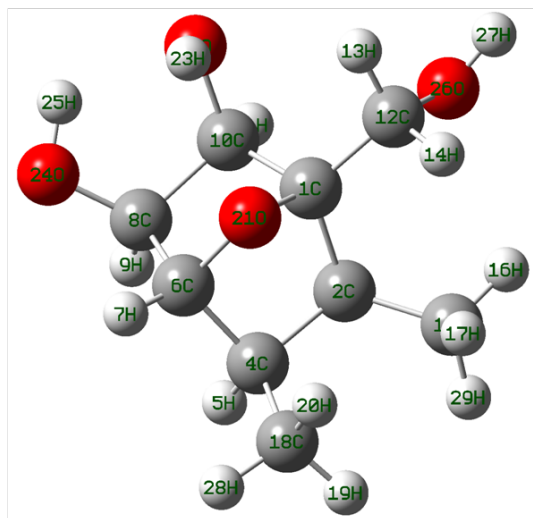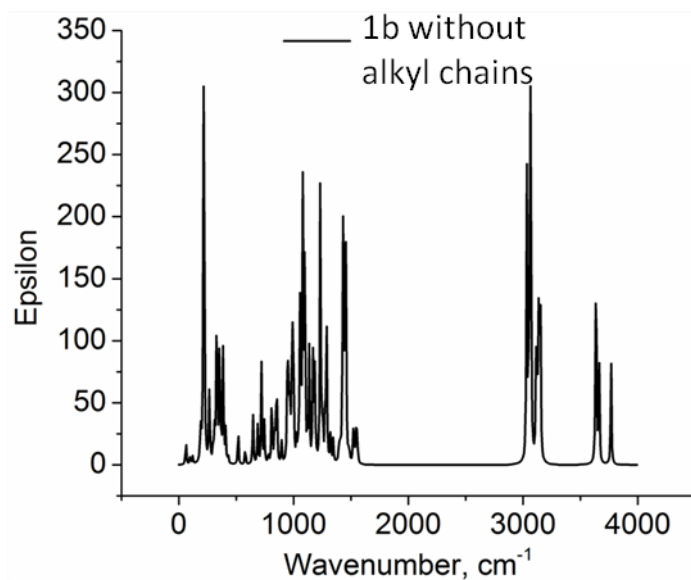

---

| Center Number | Atomic Number | Atomic Type | Coordinates (Angstroms) |           |           |
|---------------|---------------|-------------|-------------------------|-----------|-----------|
|               |               |             | X                       | Y         | Z         |
| 1             | 6             | 0           | 0.105624                | 0.626266  | 0.158644  |
| 2             | 6             | 0           | 1.221782                | -0.052140 | -0.709767 |
| 3             | 1             | 0           | 0.994436                | 0.134370  | -1.766477 |
| 4             | 6             | 0           | 0.975366                | -1.576565 | -0.393367 |
| 5             | 1             | 0           | 0.857343                | -2.140318 | -1.326789 |
| 6             | 6             | 0           | -0.366775               | -1.480380 | 0.352394  |
| 7             | 1             | 0           | -0.648864               | -2.341128 | 0.960348  |
| 8             | 6             | 0           | -1.474187               | -1.014198 | -0.622825 |
| 9             | 1             | 0           | -1.307419               | -1.423135 | -1.628831 |
| 10            | 6             | 0           | -1.246997               | 0.544265  | -0.589196 |
| 11            | 1             | 0           | -1.249799               | 1.025584  | -1.567642 |
| 12            | 6             | 0           | 0.421078                | 1.985797  | 0.756106  |
| 13            | 1             | 0           | -0.416702               | 2.306059  | 1.388539  |
| 14            | 1             | 0           | 1.315023                | 1.909574  | 1.390632  |
| 15            | 6             | 0           | 2.645417                | 0.454802  | -0.457754 |

---

|    |   |   |           |           |           |
|----|---|---|-----------|-----------|-----------|
| 16 | 1 | 0 | 2.714575  | 1.518896  | -0.700349 |
| 17 | 1 | 0 | 2.957245  | 0.316872  | 0.582640  |
| 18 | 6 | 0 | 2.043289  | -2.265469 | 0.462876  |
| 19 | 1 | 0 | 3.027166  | -2.249639 | -0.017074 |
| 20 | 1 | 0 | 2.132833  | -1.787743 | 1.443707  |
| 21 | 8 | 0 | -0.152578 | -0.329492 | 1.215427  |
| 22 | 8 | 0 | -2.292411 | 1.154941  | 0.165797  |
| 23 | 1 | 0 | -2.153965 | 0.843942  | 1.080736  |
| 24 | 8 | 0 | -2.765805 | -1.372509 | -0.181880 |
| 25 | 1 | 0 | -3.250573 | -0.530878 | -0.086536 |
| 26 | 8 | 0 | 0.619507  | 2.884636  | -0.331820 |
| 27 | 1 | 0 | 0.679289  | 3.781113  | 0.029720  |
| 28 | 1 | 0 | 1.771839  | -3.315441 | 0.624903  |
| 29 | 1 | 0 | 3.360280  | -0.083002 | -1.090392 |

---

### Molecular structure and Coordinates for CTAB devoid of an alkyl chain

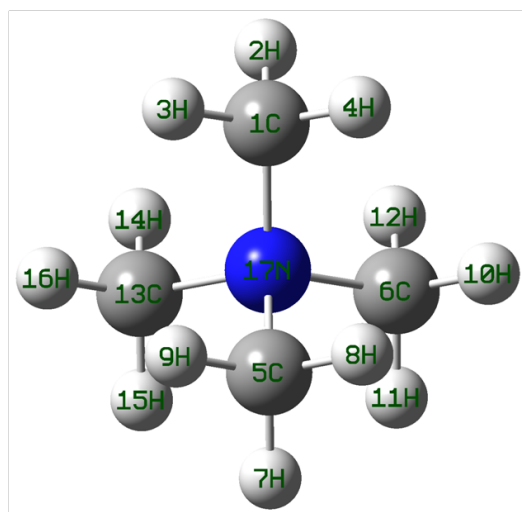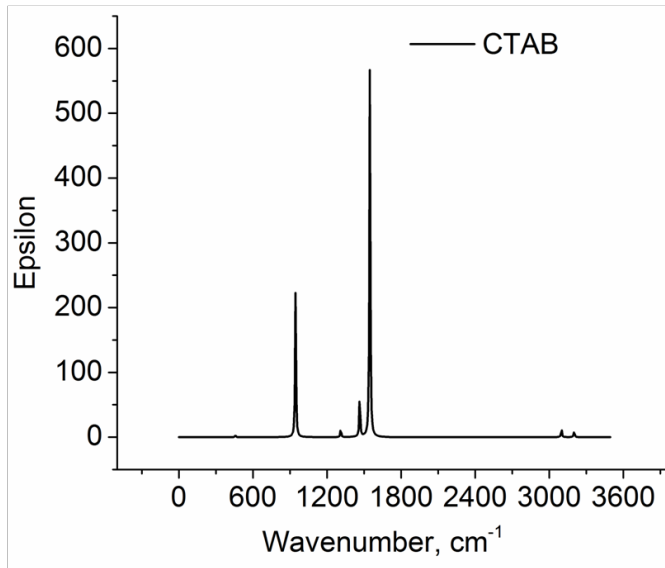

---

| Center Number | Atomic Number | Atomic Type | Coordinates (Angstroms) |          |          |
|---------------|---------------|-------------|-------------------------|----------|----------|
|               |               |             | X                       | Y        | Z        |
| 1             | 6             | 0           | 0.871473                | 0.871473 | 0.871473 |
| 2             | 1             | 0           | 1.496821                | 1.496821 | 0.232609 |

---

|    |   |   |           |           |           |
|----|---|---|-----------|-----------|-----------|
| 3  | 1 | 0 | 0.232609  | 1.496821  | 1.496821  |
| 4  | 1 | 0 | 1.496821  | 0.232609  | 1.496821  |
| 5  | 6 | 0 | -0.871473 | -0.871473 | 0.871473  |
| 6  | 6 | 0 | 0.871473  | -0.871473 | -0.871473 |
| 7  | 1 | 0 | -1.496821 | -1.496821 | 0.232609  |
| 8  | 1 | 0 | -0.232609 | -1.496821 | 1.496821  |
| 9  | 1 | 0 | -1.496821 | -0.232609 | 1.496821  |
| 10 | 1 | 0 | 1.496821  | -1.496821 | -0.232609 |
| 11 | 1 | 0 | 0.232609  | -1.496821 | -1.496821 |
| 12 | 1 | 0 | 1.496821  | -0.232609 | -1.496821 |
| 13 | 6 | 0 | -0.871473 | 0.871473  | -0.871473 |
| 14 | 1 | 0 | -0.232609 | 1.496821  | -1.496821 |
| 15 | 1 | 0 | -1.496821 | 0.232609  | -1.496821 |
| 16 | 1 | 0 | -1.496821 | 1.496821  | -0.232609 |
| 17 | 7 | 0 | 0.000000  | 0.000000  | 0.000000  |

---

### Molecular structure and Coordinates for 1b/SDS devoid of an alkyl chain

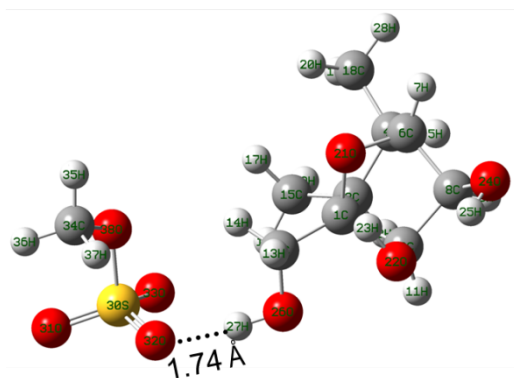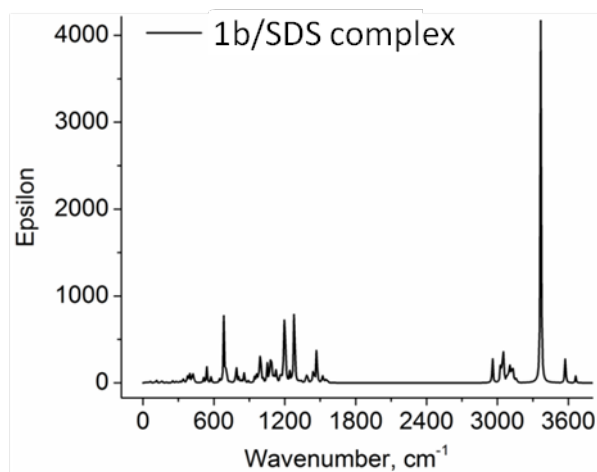

---

| Center Number | Atomic Number | Atomic Type | Coordinates (Angstroms) |           |           |
|---------------|---------------|-------------|-------------------------|-----------|-----------|
|               |               |             | X                       | Y         | Z         |
| 1             | 6             | 0           | 1.476576                | -0.292499 | -0.034064 |

---

|    |    |   |           |           |           |
|----|----|---|-----------|-----------|-----------|
| 2  | 6  | 0 | 1.477324  | 1.022117  | -0.889775 |
| 3  | 1  | 0 | 1.717676  | 0.750077  | -1.925506 |
| 4  | 6  | 0 | 2.703124  | 1.798244  | -0.273696 |
| 5  | 1  | 0 | 3.394555  | 2.111900  | -1.067279 |
| 6  | 6  | 0 | 3.325241  | 0.675955  | 0.574305  |
| 7  | 1  | 0 | 4.035653  | 0.983344  | 1.345092  |
| 8  | 6  | 0 | 3.862945  | -0.437051 | -0.360629 |
| 9  | 1  | 0 | 4.245482  | -0.007414 | -1.296003 |
| 10 | 6  | 0 | 2.543582  | -1.262631 | -0.596316 |
| 11 | 1  | 0 | 2.370889  | -1.570995 | -1.627415 |
| 12 | 6  | 0 | 0.124065  | -0.926843 | 0.249227  |
| 13 | 1  | 0 | 0.256093  | -1.747867 | 0.976778  |
| 14 | 1  | 0 | -0.538945 | -0.190061 | 0.718480  |
| 15 | 6  | 0 | 0.152729  | 1.790168  | -0.921482 |
| 16 | 1  | 0 | -0.644364 | 1.184681  | -1.358210 |
| 17 | 1  | 0 | -0.179862 | 2.094896  | 0.075433  |
| 18 | 6  | 0 | 2.359278  | 3.019368  | 0.585297  |
| 19 | 1  | 0 | 1.819850  | 3.782081  | 0.014535  |
| 20 | 1  | 0 | 1.738475  | 2.733739  | 1.440045  |
| 21 | 8  | 0 | 2.156926  | 0.085914  | 1.199016  |
| 22 | 8  | 0 | 2.617370  | -2.458250 | 0.188539  |
| 23 | 1  | 0 | 2.400193  | -2.167466 | 1.094387  |
| 24 | 8  | 0 | 4.884045  | -1.224235 | 0.218150  |
| 25 | 1  | 0 | 4.443299  | -2.079779 | 0.398910  |
| 26 | 8  | 0 | -0.383710 | -1.391870 | -0.979004 |
| 27 | 1  | 0 | -1.371081 | -1.408735 | -0.892696 |
| 28 | 1  | 0 | 3.278435  | 3.478631  | 0.972715  |
| 29 | 1  | 0 | 0.257881  | 2.698519  | -1.528183 |
| 30 | 16 | 0 | -3.736353 | -0.062133 | -0.377517 |
| 31 | 8  | 0 | -5.197698 | -0.163998 | -0.213486 |
| 32 | 8  | 0 | -3.054614 | -1.393929 | -0.451307 |
| 33 | 8  | 0 | -3.240321 | 0.933620  | -1.339054 |
| 34 | 6  | 0 | -3.577097 | -0.139835 | 2.234920  |
| 35 | 1  | 0 | -3.147488 | 0.377781  | 3.099682  |

|    |   |   |           |           |          |
|----|---|---|-----------|-----------|----------|
| 36 | 1 | 0 | -4.670239 | -0.160157 | 2.323228 |
| 37 | 1 | 0 | -3.201081 | -1.170873 | 2.204726 |
| 38 | 8 | 0 | -3.170794 | 0.590233  | 1.085251 |

---

### Molecular structure and Coordinates for 1b/CTAB devoid of alkyl chains

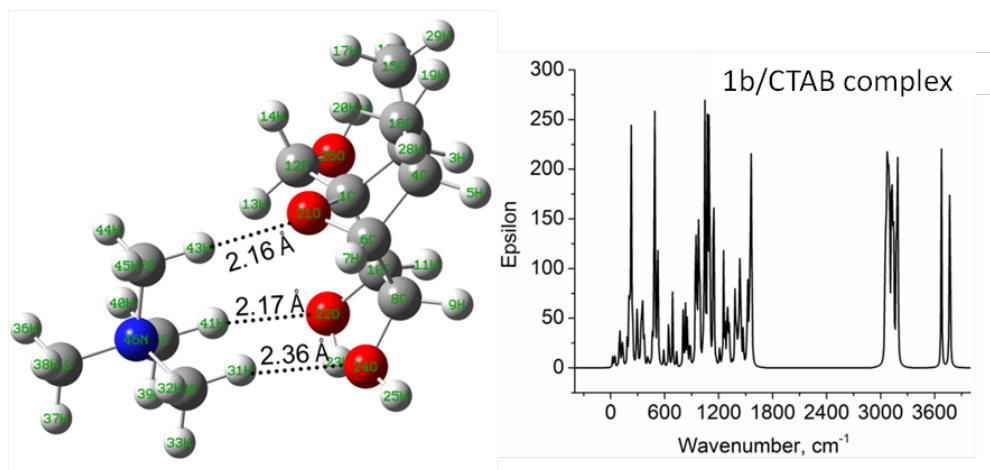

---

| Center Number | Atomic Number | Atomic Type | Coordinates (Angstroms) |   |   |
|---------------|---------------|-------------|-------------------------|---|---|
|               |               |             | X                       | Y | Z |

---

|    |   |   |           |           |           |
|----|---|---|-----------|-----------|-----------|
| 1  | 6 | 0 | -1.323292 | 0.637488  | 0.137816  |
| 2  | 6 | 0 | -2.810291 | 0.210044  | -0.120319 |
| 3  | 1 | 0 | -3.388549 | 0.374046  | 0.796433  |
| 4  | 6 | 0 | -2.654544 | -1.342341 | -0.361090 |
| 5  | 1 | 0 | -3.268545 | -1.895446 | 0.359693  |
| 6  | 6 | 0 | -1.156219 | -1.520973 | -0.044804 |
| 7  | 1 | 0 | -0.687611 | -2.414159 | -0.464021 |
| 8  | 6 | 0 | -0.919509 | -1.328012 | 1.466815  |
| 9  | 1 | 0 | -1.704904 | -1.796721 | 2.067642  |
| 10 | 6 | 0 | -0.946831 | 0.238282  | 1.586522  |
| 11 | 1 | 0 | -1.681891 | 0.594818  | 2.315947  |
| 12 | 6 | 0 | -0.922027 | 2.056935  | -0.249408 |
| 13 | 1 | 0 | 0.153022  | 2.176527  | -0.097551 |
| 14 | 1 | 0 | -1.131888 | 2.229527  | -1.312970 |

|    |   |   |           |           |           |
|----|---|---|-----------|-----------|-----------|
| 15 | 6 | 0 | -3.517273 | 0.965777  | -1.251069 |
| 16 | 1 | 0 | -3.640777 | 2.027568  | -1.008876 |
| 17 | 1 | 0 | -2.978211 | 0.898770  | -2.200636 |
| 18 | 6 | 0 | -2.986809 | -1.852220 | -1.767955 |
| 19 | 1 | 0 | -4.025755 | -1.648400 | -2.042152 |
| 20 | 1 | 0 | -2.338628 | -1.396329 | -2.523167 |
| 21 | 8 | 0 | -0.564936 | -0.337946 | -0.630057 |
| 22 | 8 | 0 | 0.341805  | 0.732360  | 1.919153  |
| 23 | 1 | 0 | 0.738750  | 0.049742  | 2.490000  |
| 24 | 8 | 0 | 0.364748  | -1.796400 | 1.905937  |
| 25 | 1 | 0 | 0.250686  | -2.666235 | 2.317090  |
| 26 | 8 | 0 | -1.547171 | 3.016140  | 0.587656  |
| 27 | 1 | 0 | -2.427867 | 3.211922  | 0.234874  |
| 28 | 1 | 0 | -2.845181 | -2.938084 | -1.814211 |
| 29 | 1 | 0 | -4.523583 | 0.566703  | -1.409783 |
| 30 | 6 | 0 | 3.282590  | -1.259275 | 0.193442  |
| 31 | 1 | 0 | 2.261151  | -1.320873 | 0.575325  |
| 32 | 1 | 0 | 3.488157  | -2.090290 | -0.483787 |
| 33 | 1 | 0 | 3.996577  | -1.270430 | 1.019182  |
| 34 | 6 | 0 | 4.855860  | 0.136802  | -1.089382 |
| 35 | 6 | 0 | 3.160363  | 1.191643  | 0.355123  |
| 36 | 1 | 0 | 4.959970  | 1.074435  | -1.637607 |
| 37 | 1 | 0 | 5.549526  | 0.118998  | -0.247343 |
| 38 | 1 | 0 | 5.052470  | -0.706604 | -1.753269 |
| 39 | 1 | 0 | 3.890993  | 1.177633  | 1.166268  |
| 40 | 1 | 0 | 3.257662  | 2.119003  | -0.212041 |
| 41 | 1 | 0 | 2.147242  | 1.084622  | 0.753072  |
| 42 | 6 | 0 | 2.476307  | 0.053946  | -1.722124 |
| 43 | 1 | 0 | 1.459760  | -0.048842 | -1.332858 |
| 44 | 1 | 0 | 2.592967  | 1.000101  | -2.253566 |
| 45 | 1 | 0 | 2.715406  | -0.776198 | -2.389510 |
| 46 | 7 | 0 | 3.449076  | 0.031770  | -0.567870 |

---



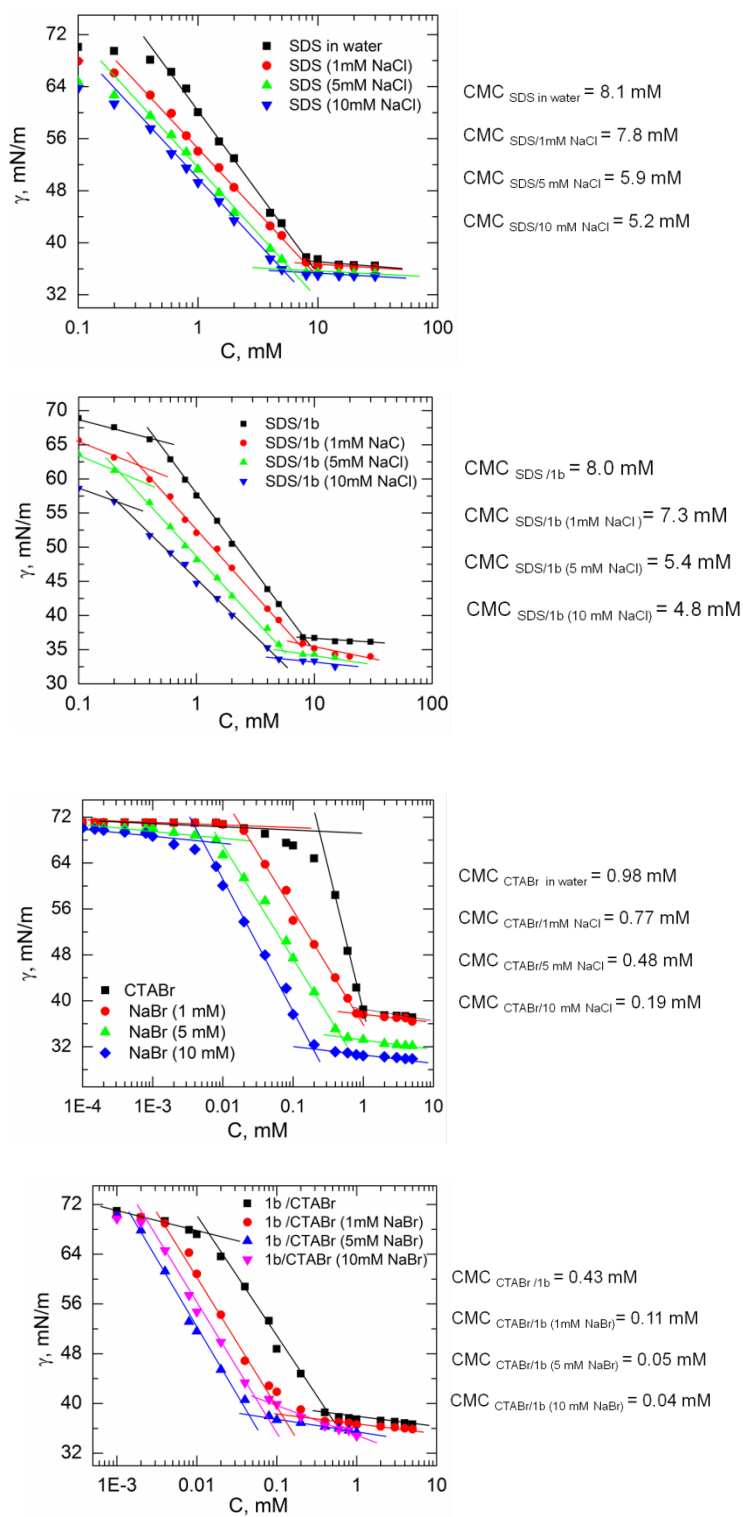

**Figure S12.** Surface tension plots of pure surfactants as well as their association complexes with 1b.

### Additional Images of 0-D Surface Micelles:

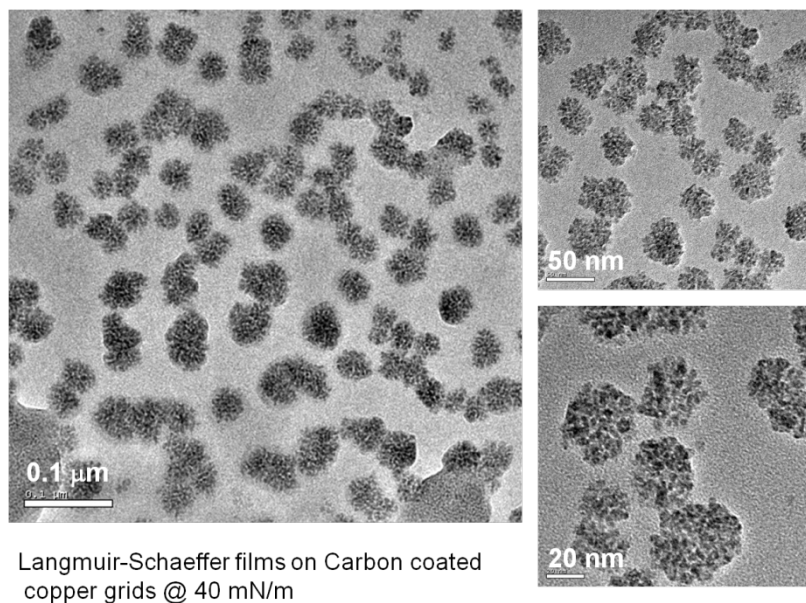

Figure A1. Transmission Electron Micrograph of a Langmuir Schaeffer film deposited on a carbon coated copper grid at 40 mN/m by horizontal deposition technique.

### 0-D Reverse micelles:

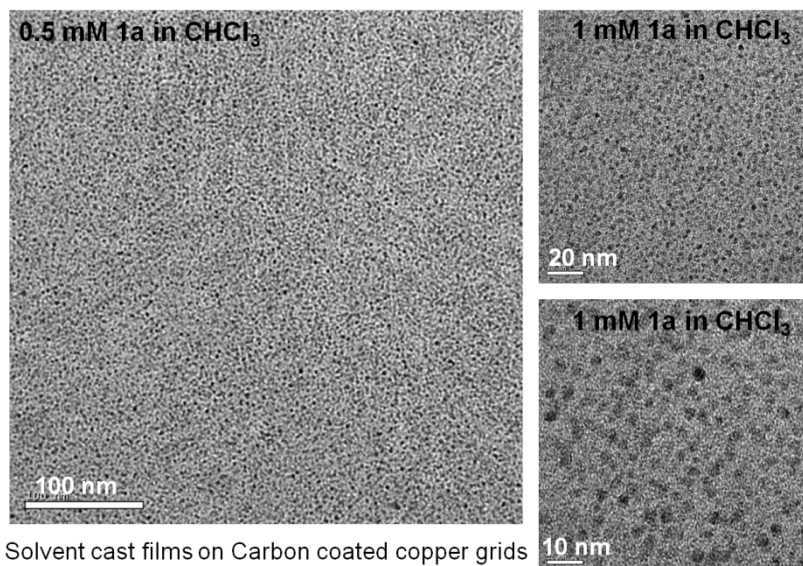

Figure A2. Transmission electron micrographs of freshly prepared 0.5 mM and 1mM 1a solution in chloroform drop casted onto a carbon-coated copper grid.

## 1-D Nanofibers:

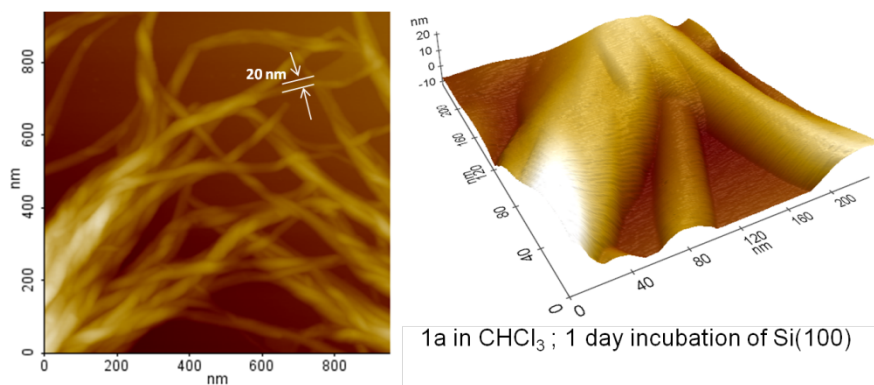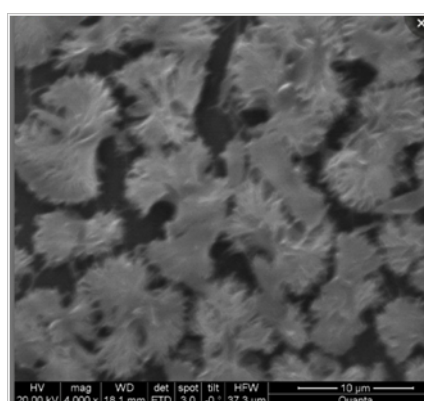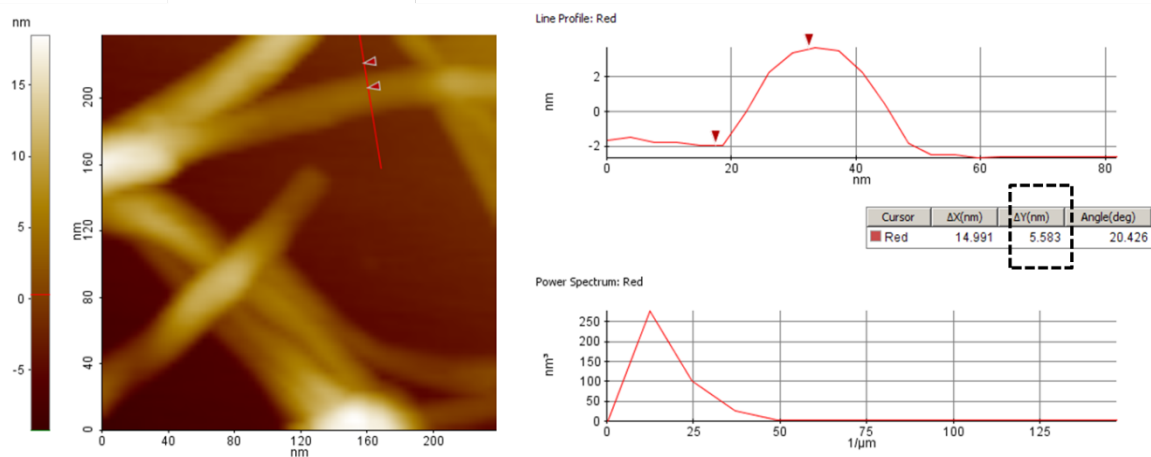

Figure A3. Non contact mode AFM images of 1-D nanofibers of 1a after 1 day incubation in chloroform solution. The line profile indicates the height/thickness of the nanofiber as  $\sim 5.5$  nm. Scanning Electron Micrograph of 1-D nanofibers which are partially converted to 3-D microflowers. For SEM, the sampling is done on a Silicon (100) substrate. Prior to that the substrate is treated with piranha solution and subsequently with water to make it hydrophilic.

### 3-D micro flowers:

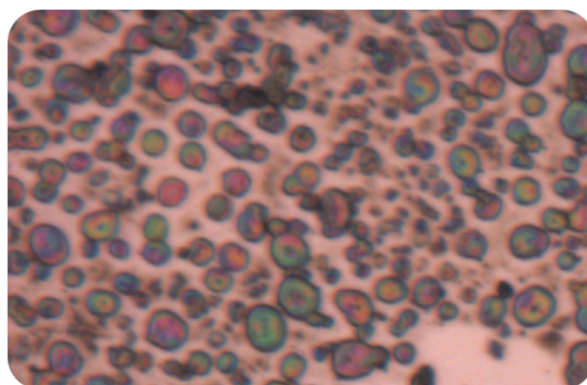

Figure A4. Optical Micrograph of 3-D microflowers imaged after incubating the Silicon (100) substrate for a period of 36 hours. The concentration of 1a used is 1mM in chloroform solution.

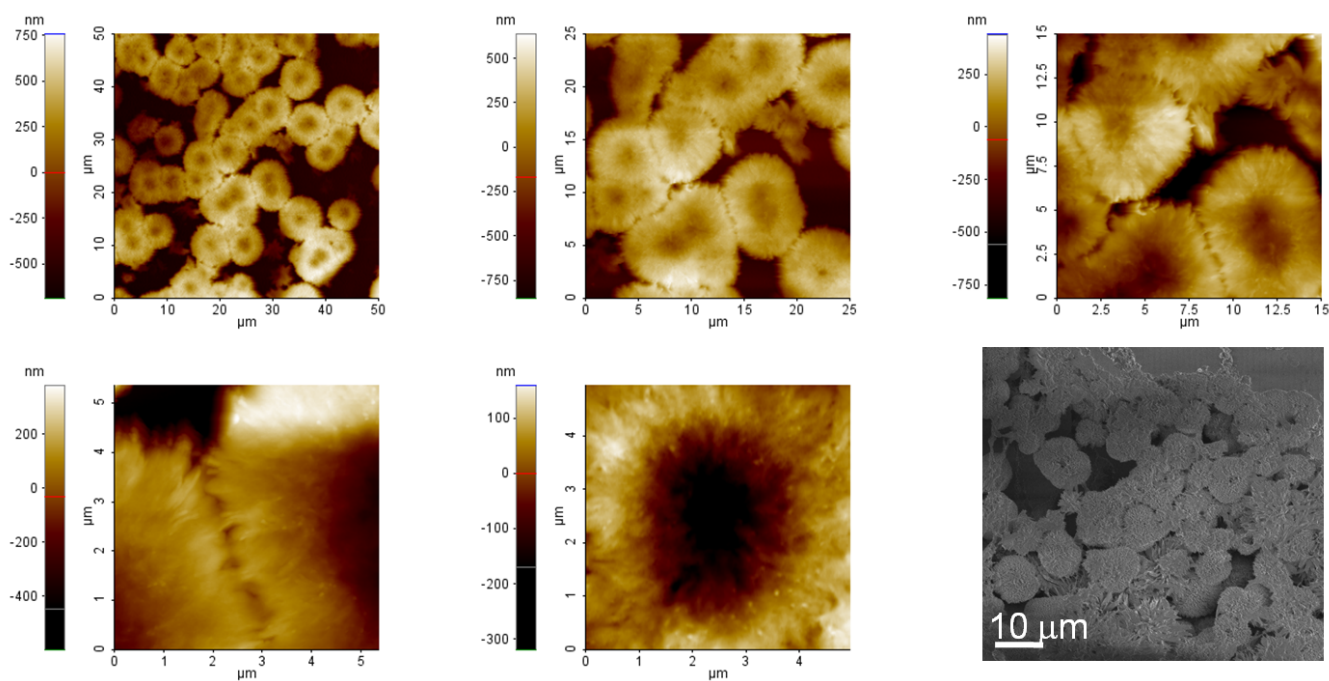

Figure A5: High-resolution AFM images of 3-D microflowers imaged using super-sharp Single crystal silicon probes (radius of curvature (ROC) < 5nm). The concentration of 1a used is 1mM in chloroform solution. All the images were procured at a scan rate of 1Hz. The SEM image was done for the sample that is subjected to AFM imaging. Note that the SEM samples were not coated with gold.

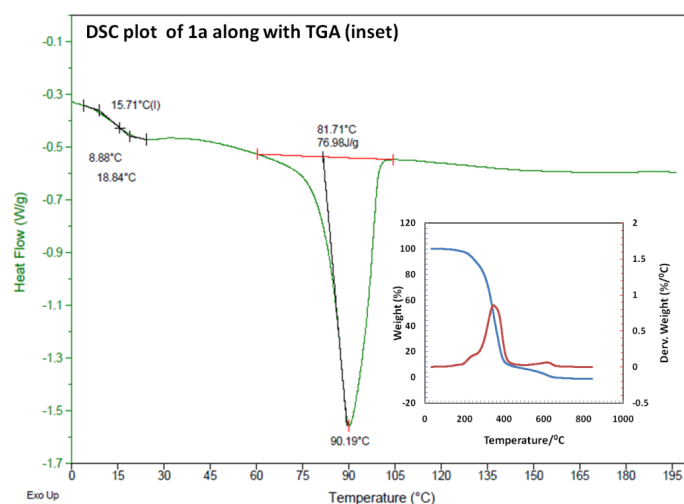

Fig. A6 Differential Scanning Calorimetric (DSC) and Thermo-gravimetric analysis (inset) of 1a powder showing phase transition points and decomposition temperature ranges.

**Roughness Statistical parameters along with histogram for 1-D nanofibers in Fig.3 (b):**

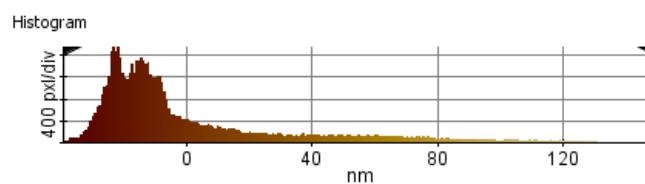

|               |         |
|---------------|---------|
| Minimum (nm)  | -39.495 |
| Maximum (nm)  | 149.714 |
| Mid (nm)      | 55.110  |
| Mean (nm)     | 0.312   |
| $R_{pv}$ (nm) | 189.209 |
| $R_q$ (nm)    | 32.837  |
| $R_a$ (nm)    | 24.373  |
| $R_z$ (nm)    | 185.603 |
| $R_{sk}$ (nm) | -1.754  |
| $R_{ku}$ (nm) | 5.576   |

$R_{pv}$  = peak-to-valley,  $R_q$  = standard deviation of the height value,  $R_a$  = Roughness average,  $R_{sk}$  = skewness,  $R_{ku}$  = kurtosis

**Roughness Statistical parameters along with histogram for 3-D microflowers in Fig.3 (c):**

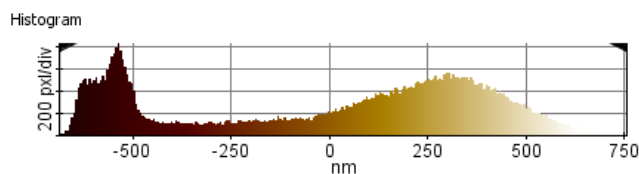

|               |          |
|---------------|----------|
| Minimum (nm)  | -687.457 |
| Maximum (nm)  | 756.290  |
| Mid (nm)      | 34.416   |
| Mean (nm)     | -1.266   |
| $R_{pv}$ (nm) | 1443.747 |
| $R_q$ (nm)    | 394.744  |
| $R_a$ (nm)    | 349.389  |
| $R_z$ (nm)    | 1431.694 |
| $R_{sk}$ (nm) | 0.343    |
| $R_{ku}$ (nm) | 1.675    |

$R_{pv}$  = peak-to-valley,  $R_q$  = standard deviation of the height value,  $R_a$  = Roughness average,  $R_{sk}$  = skewness,  $R_{ku}$  = kurtosis

**Roughness Statistical parameters along with histogram for 2-D sheets in Fig.4 (d):**

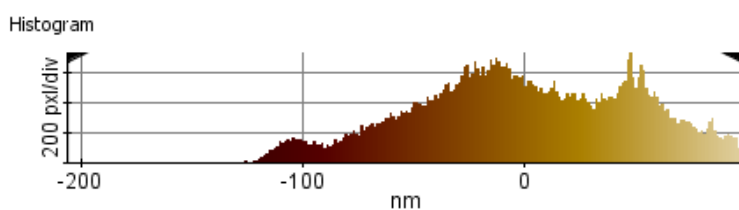

|               |          |
|---------------|----------|
| Minimum (nm)  | -206.098 |
| Maximum (nm)  | 98.196   |
| Mid (nm)      | -53.951  |
| Mean (nm)     | -0.762   |
| $R_{pv}$ (nm) | 304.293  |
| $R_q$ (nm)    | 49.051   |

|               |         |
|---------------|---------|
| $R_a$ (nm)    | 40.592  |
| $R_z$ (nm)    | 237.904 |
| $R_{sk}$ (nm) | 0.159   |
| $R_{ku}$ (nm) | 2.346   |

**Roughness Statistical parameters along with histogram for Lithium ion sensor in Fig.4 (c):**

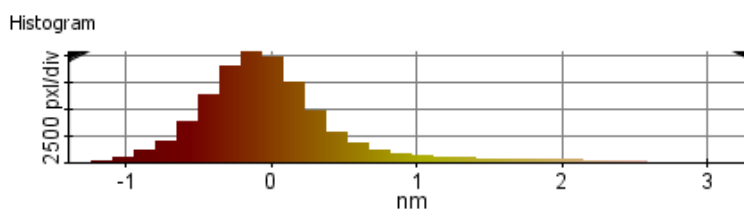

|               |        |
|---------------|--------|
| Minimum (nm)  | -1.396 |
| Maximum (nm)  | 3.316  |
| Mid (nm)      | 0.960  |
| Mean (nm)     | -0.007 |
| $R_{pv}$ (nm) | 4.713  |
| $R_q$ (nm)    | 0.522  |
| $R_a$ (nm)    | 0.365  |
| $R_z$ (nm)    | 4.442  |
| $R_{sk}$ (nm) | -1.556 |
| $R_{ku}$ (nm) | 7.305  |

$R_{pv}$  = peak-to-valley,  $R_q$  = standard deviation of the height value,  $R_a$  = Roughness average,  $R_{sk}$  = skewness,  $R_{ku}$  = kurtosis
